# Supplementary material for: Termination of Resuscitation Rules and Survival Among Patients With Out-of-Hospital Cardiac Arrest: A Systematic Review and Meta-Analysis
Source: PubMed Central journal article supplement (PMC11222995; doi:10.1001/jamanetworkopen.2024.20040), 2024-07-03
Supplement: jamanetwopen-e2420040-s001.pdf [file jamanetwopen-e2420040-s001.pdf]

## Supplementary Online Content

Smyth MA, Gunson I, Coppola A, et al. Termination of resuscitation rules and survival among patients with out-of-hospital cardiac arrest: a systematic review and meta-analysis. *JAMA Netw Open*. 2024;7(7):e2420040.  
doi:10.1001/jamanetworkopen.2024.20040

**eTable 1.** PICOST Criteria

**eTable 2.** MEDLINE Search Strategy

**eTable 3.** Embase Search Strategy

**eTable 4.** CINAHL Search Strategy

**eTable 5.** Cochrane Search Strategy

**eTable 6.** Web of Science Search Strategy

**eTable 7.** Derivation Studies Paired Sensitivity and Specificity

**eTable 8.** External Validation Studies Paired Sensitivity and Specificity

**eTable 9.** Clinical Studies Paired Sensitivity and Specificity

**eTable 10.** Summary of Included Studies

**eTable 11.** Description of Termination of Resuscitation (TOR) Rules

**eFigure 1.** QUADAS-2 Summary Risk of Bias and Applicability

**eFigure 2.** Study Risk of Bias

**eFigure 3.** Deeks Funnel Plot Asymmetry Test

**eFigure 4.** Bivariate Summary Receiver Operating Characteristic (SROC) Curves

**eReferences**

This supplementary material has been provided by the authors to give readers additional information about their work.

**eTable 1. PICOST Criteria**

---

|                      |                                                                                                                                                                                                                                                                                                                                                                                                                                                                                                                                                                                                                                                                                                                                                                                                                                                                                                                                                                                                                                              |
|----------------------|----------------------------------------------------------------------------------------------------------------------------------------------------------------------------------------------------------------------------------------------------------------------------------------------------------------------------------------------------------------------------------------------------------------------------------------------------------------------------------------------------------------------------------------------------------------------------------------------------------------------------------------------------------------------------------------------------------------------------------------------------------------------------------------------------------------------------------------------------------------------------------------------------------------------------------------------------------------------------------------------------------------------------------------------|
| <i>Population:</i>   | Adults and children with out-of-hospital cardiac arrest, where resuscitation is attempted, but return of spontaneous circulation (ROSC) is not achieved.                                                                                                                                                                                                                                                                                                                                                                                                                                                                                                                                                                                                                                                                                                                                                                                                                                                                                     |
| <i>Intervention:</i> | Termination of resuscitation (TOR) rule predicted outcome.                                                                                                                                                                                                                                                                                                                                                                                                                                                                                                                                                                                                                                                                                                                                                                                                                                                                                                                                                                                   |
| <i>Comparison:</i>   | True outcome                                                                                                                                                                                                                                                                                                                                                                                                                                                                                                                                                                                                                                                                                                                                                                                                                                                                                                                                                                                                                                 |
| <i>Outcomes:</i>     | Ability of TOR rule to predict death.<br>Economic implications of application of TOR rules.                                                                                                                                                                                                                                                                                                                                                                                                                                                                                                                                                                                                                                                                                                                                                                                                                                                                                                                                                  |
| <i>Study Design:</i> | <i>Inclusion criteria:</i> Systematic reviews, meta-analyses, randomised controlled trials, case-control studies, cohort studies, cross-sectional studies, retrospective analyses, economic evaluations, modelling studies.<br><i>Exclusion criteria:</i> Non-peer reviewed studies (e.g., conference abstracts, trial protocols, narrative reviews, letters, editorials, commentaries), animal studies. No language restrictions were placed.<br>We excluded studies predicting poor neurologic outcome rather than death. Although favourable neurologic outcome is critically important to patients, we were unable to identify any EMS systems that advocated termination of resuscitation where poor neurologic outcome was predicted.<br>We excluded studies addressing outcome for post-ROSC patients. Although it would be possible to transpose the data such that death becomes the true positive, the populations included in such studies comprise only ROSC patients, thus they are different to the cardiac arrest population. |
| <i>Timeframe:</i>    | The initial search was conducted from database inception to mid-July 2019. Covid-19 resulted in the project being paused. The final update occurred in January 2024.                                                                                                                                                                                                                                                                                                                                                                                                                                                                                                                                                                                                                                                                                                                                                                                                                                                                         |

---

## eTable 2. MEDLINE Search Strategy

- 1 exp Out-of-Hospital Cardiac Arrest/
- 2 ohca.mp.
- 3 exp Ventricular Fibrillation/ or exp Tachycardia, Ventricular/
- 4 heart arrest.mp. or exp Heart Arrest/
- 5 cardiopulmonary arrest.mp.
- 6 circulatory arrest.mp.
- 7 cardiac standstill.mp.
- 8 pulseless electrical activity.mp.
- 9 pea.mp.
- 10 pulseless.mp.
- 11 shockable.mp.
- 12 (non-shockable or non shockable).mp.
- 13 cardiac arrest.mp.
- 14 ventricular fibrillation.mp.
- 15 ventricular tachycardia.mp.
- 16 3 or 4 or 5 or 6 or 7 or 8 or 9 or 10 or 11 or 12 or 13 or 14 or 15
- 17 (out of hospital or out-of-hospital or prehospital or pre-hospital or pre hospital).mp.
- 18 exp Emergency Medical Services/ or emergency medical service\*.mp.
- 19 exp Emergency Medical Technicians/ or paramedic\*.mp.
- 20 ambulance\*.mp. or exp Ambulances/
- 21 exp air ambulances/ or air ambulance\*.mp. or hems.mp.
- 22 (ems or emt).mp.
- 23 field.mp.
- 24 17 or 18 or 19 or 20 or 21 or 22 or 23
- 25 16 and 24
- 26 1 or 2 or 25
- 27 exp Resuscitation Orders/ or exp Resuscitation/ or resuscitat\*.mp.
- 28 cardiopulmonary resuscitation.mp. or exp Cardiopulmonary Resuscitation/
- 29 cpr.mp.
- 30 basic life support.mp. or exp Life Support Care/
- 31 exp Advanced Cardiac Life Support/ or advanced life support.mp.
- 32 (bls or als).mp.
- 33 exp Heart Massage/ or chest compression\*.mp.
- 34 27 or 28 or 29 or 30 or 31 or 32 or 33
- 35 26 and 34
- 36 (terminat\* or cease or cessation or stop or withdraw\* or withhold\* or withheld or TOR or futile or futility or rule\* or algorithm\* or decease\* or decision\* or prognosis or predict\*).mp.
- 37 exp Prognosis/
- 38 36 or 37
- 39 35 and 38
- 40 (letter or case reports or editorial or lecture).pt.
- 41 39 not 40
- 42 limit 41 to humans

### **eTable 3. Embase Search Strategy**

- 1 exp "out of hospital cardiac arrest"/
- 2 ohca.mp.
- 3 ventricular fibrillation.mp. or exp heart ventricle fibrillation/
- 4 ventricular tachycardia.mp. or exp heart ventricle tachycardia/
- 5 heart arrest.mp. or exp heart arrest/
- 6 exp cardiopulmonary arrest/ or cardiopulmonary arrest.mp.
- 7 circulatory arrest.mp.
- 8 cardiac standstill.mp.
- 9 pulseless electrical activity.mp.
- 10 pea.mp.
- 11 pulseless.mp.
- 12 shockable.mp.
- 13 (non-shockable or non shockable).mp.
- 14 cardiac arrest.mp.
- 15 or/3-14
- 16 (out of hospital or out-of-hospital or prehospital or pre-hospital or pre hospital).mp.
- 17 exp emergency health service/ or emergency medical service\*.mp.
- 18 paramedic\*.mp. or exp paramedical personnel/
- 19 emergency medical technician.mp. or exp rescue personnel/
- 20 exp air medical transport/ or air ambulance\*.mp. or HEMS.mp.
- 21 exp ambulance/ or ambulance\*.mp.
- 22 (ems or emt).mp.
- 23 field.mp.
- 24 or/16-22
- 25 15 and 24
- 26 1 or 2 or 25
- 27 exp resuscitation/ or resuscitat\*.mp.
- 28 cardiopulmonary resuscitation.mp.
- 29 resuscitation orders.mp.
- 30 cpr.mp.
- 31 basic life support.mp.
- 32 life support care.mp.
- 33 advanced life support.mp.
- 34 advanced cardiac life support.mp.
- 35 (bls or als).mp.
- 36 chest compression\*.mp.
- 37 heart massage.mp. or exp heart massage/
- 38 or/27-37
- 39 26 and 38
- 40 (terminat\* or cease or cessation or stop or withdraw\* or withhold\* or withheld or TOR or futile or futility or rule\* or algorithm\* or decease\* or decision\* or prognosis or predict\*).mp.
- 41 exp prognosis/
- 42 40 or 41
- 43 39 and 42
- 44 (letter or editorial).pt.
- 45 43 not 44
- 46 limit 45 to human

#### eTable 4. CINAHL Search Strategy

|     |                                                                                                                                                                                       |
|-----|---------------------------------------------------------------------------------------------------------------------------------------------------------------------------------------|
| S1  | "out of hospital cardiac arrest"                                                                                                                                                      |
| S2  | "ohca"                                                                                                                                                                                |
| S3  | (MH "Ventricular Fibrillation") OR "ventricular fibrillation"                                                                                                                         |
| S4  | (MH "Tachycardia, Ventricular") OR "ventricular tachycardia"                                                                                                                          |
| S5  | (MH "Heart Arrest+") OR "heart arrest"                                                                                                                                                |
| S6  | "cardiopulmonary arrest"                                                                                                                                                              |
| S7  | "circulatory arrest"                                                                                                                                                                  |
| S8  | "cardiac standstill"                                                                                                                                                                  |
| S9  | "pulseless electrical activity"                                                                                                                                                       |
| S10 | "pea"                                                                                                                                                                                 |
| S11 | "pulseless"                                                                                                                                                                           |
| S12 | "shockable"                                                                                                                                                                           |
| S13 | "non-shockable" or "shockable"                                                                                                                                                        |
| S14 | "cardiac arrest"                                                                                                                                                                      |
| S15 | S3 OR S4 OR S5 OR S6 OR S7 OR S8 OR S9 OR S10 OR S11 OR S12 OR S13 OR S14                                                                                                             |
| S16 | "out of hospital" or "out-of-hospital" or "pre-hospital" or "pre hospital" or prehospital                                                                                             |
| S17 | (MH "Emergency Medical Services+") OR "emergency medical service*"                                                                                                                    |
| S18 | (MH "Emergency Medical Technicians") OR "paramedic*" OR (MH "Prehospital Care")                                                                                                       |
| S19 | (MH "Ambulances") OR "ambulance*" or HEMS                                                                                                                                             |
| S20 | "ems or emt"                                                                                                                                                                          |
| S21 | "field"                                                                                                                                                                               |
| S22 | S16 OR S17 OR S18 OR S19 OR S20 OR S21                                                                                                                                                |
| S23 | S15 AND S22                                                                                                                                                                           |
| S24 | S1 OR S2 OR S23                                                                                                                                                                       |
| S25 | (MH "Resuscitation+") OR (MH "Resuscitation Orders") OR "resuscitat*"                                                                                                                 |
| S26 | (MH "Resuscitation, Cardiopulmonary+") OR "cardiopulmonary resuscitation"                                                                                                             |
| S27 | "cpr"                                                                                                                                                                                 |
| S28 | (MH "Advanced Cardiac Life Support+") OR (MH "Life Support Care+") OR "basic life support"                                                                                            |
| S29 | "advanced life support"                                                                                                                                                               |
| S30 | "als or bls"                                                                                                                                                                          |
| S31 | "chest compression*"                                                                                                                                                                  |
| S32 | (MH "Heart Massage") OR "heart massage"                                                                                                                                               |
| S33 | S25 OR S26 OR S27 OR S28 OR S29 OR S30 OR S31 OR S32                                                                                                                                  |
| S34 | S24 AND S33                                                                                                                                                                           |
| S35 | terminat* or cease or cessation or stop or withdraw* or withheld or withhold* or TOR or futile or<br>futility or rule* or algorithm* or decess* or decision* or prognosis or predict* |
| S36 | (MH "Prognosis+")                                                                                                                                                                     |
| S37 | S35 OR S36                                                                                                                                                                            |
| S38 | S34 AND S37                                                                                                                                                                           |

## eTable 5. Cochrane Search Strategy

|     |                                                                                                                                                                                                |
|-----|------------------------------------------------------------------------------------------------------------------------------------------------------------------------------------------------|
| #1  | MeSH descriptor: [Out-of-Hospital Cardiac Arrest] explode all tree                                                                                                                             |
| #2  | ("OHCA"):ti,ab,kw                                                                                                                                                                              |
| #3  | MeSH descriptor: [Ventricular Fibrillation] explode all trees                                                                                                                                  |
| #4  | MeSH descriptor: [Tachycardia, Ventricular] explode all trees                                                                                                                                  |
| #5  | (ventricular fibrillation):ti,ab,kw                                                                                                                                                            |
| #6  | (ventricular tachycardia):ti,ab,kw                                                                                                                                                             |
| #7  | (heart arrest):ti,ab,kw                                                                                                                                                                        |
| #8  | MeSH descriptor: [Heart Arrest] explode all trees                                                                                                                                              |
| #9  | (cardiopulmonary arrest):ti,ab,kw                                                                                                                                                              |
| #10 | (circulatory arrest):ti,ab,kw                                                                                                                                                                  |
| #11 | ("cardiac standstill"):ti,ab,kw                                                                                                                                                                |
| #12 | ("pulseless electrical activity"):ti,ab,kw                                                                                                                                                     |
| #13 | (PEA):ti,ab,kw                                                                                                                                                                                 |
| #14 | (pulseless):ti,ab,kw                                                                                                                                                                           |
| #15 | (shockable):ti,ab,kw                                                                                                                                                                           |
| #16 | (non-shockable or non shockable):ti,ab,kw                                                                                                                                                      |
| #17 | (cardiac arrest):ti,ab,kw                                                                                                                                                                      |
| #18 | #3 or #4 or #5 or #6 or #7 or #8 or #9 or #10 or #11 or #12 or #13 or #14 or #15 or #16 or #17                                                                                                 |
| #19 | (out of hospital or out-of-hospital or pre-hospital or pre hospital or prehospital):ti,ab,kw                                                                                                   |
| #20 | MeSH descriptor: [Emergency Medical Services] explode all trees                                                                                                                                |
| #21 | (emergency medical service*):ti,ab,kw                                                                                                                                                          |
| #22 | (paramedic*):ti,ab,kw                                                                                                                                                                          |
| #23 | MeSH descriptor: [Emergency Medical Technicians] explode all trees                                                                                                                             |
| #24 | (ambulance*):ti,ab,kw                                                                                                                                                                          |
| #25 | MeSH descriptor: [Ambulances] explode all trees                                                                                                                                                |
| #26 | (ems or emt):ti,ab,kw                                                                                                                                                                          |
| #27 | field                                                                                                                                                                                          |
| #28 | #19 or #20 or #21 or #22 or #23 or #24 or #25 or #26 or #27                                                                                                                                    |
| #29 | #18 and #28                                                                                                                                                                                    |
| #30 | #1 or #2 or #29                                                                                                                                                                                |
| #31 | (resuscitat*):ti,ab,kw                                                                                                                                                                         |
| #32 | MeSH descriptor: [Resuscitation] explode all trees                                                                                                                                             |
| #33 | MeSH descriptor: [Resuscitation Orders] explode all trees                                                                                                                                      |
| #34 | MeSH descriptor: [Cardiopulmonary Resuscitation] explode all trees                                                                                                                             |
| #35 | (cardiopulmonary resuscitation):ti,ab,kw                                                                                                                                                       |
| #36 | ("CPR"):ti,ab,kw                                                                                                                                                                               |
| #37 | (basic life support):ti,ab,kw                                                                                                                                                                  |
| #38 | MeSH descriptor: [Life Support Care] explode all trees                                                                                                                                         |
| #39 | (advanced life support):ti,ab,kw                                                                                                                                                               |
| #40 | MeSH descriptor: [Advanced Cardiac Life Support] explode all trees                                                                                                                             |
| #41 | (als or bls):ti,ab,kw                                                                                                                                                                          |
| #42 | MeSH descriptor: [Heart Massage] explode all trees                                                                                                                                             |
| #43 | (chest compression*):ti,ab,kw                                                                                                                                                                  |
| #44 | #31 or #32 or #33 or #34 or #35 or #36 or #37 or #38 or #39 or #40 or #41 or #42 or #43                                                                                                        |
| #45 | #30 and #44                                                                                                                                                                                    |
| #46 | (terminat* or cease or cessation or stop or withdraw* or withhold* or withheld or TOR or futile or futility or rule* or algorithm* or decease* or decision* or prognosis or predict*):ti,ab,kw |
| #47 | MeSH descriptor: [Prognosis] explode all trees                                                                                                                                                 |
| #48 | #46 or #47                                                                                                                                                                                     |
| #49 | #45 and #48                                                                                                                                                                                    |

## eTable 6. Web of Science Search Strategy

#7 #6 AND #5

*Indexes=SCI-EXPANDED, SSCI, CPCI-S, CPCI-SSH Timespan=1900-2023*

#6 **TOPIC:** (terminat\* or cease or cessation or stop or withdraw\* or withheld or withhold\* or TOR or futile or futility or rule\* or algorithm\* or decease\* or decision\* or prognosis or predict\*)

*Indexes=SCI-EXPANDED, SSCI, CPCI-S, CPCI-SSH Timespan=1900-2023*

#5 #4 AND #3

*Indexes=SCI-EXPANDED, SSCI, CPCI-S, CPCI-SSH Timespan=1900-2023*

#4 **TOPIC:** (resuscitat\* or cpr or "basic life support" or "life support care" or "advanced cardiac life support" or "advanced life support" or bls or als or "heart massage" or "chest compression\*")

*Indexes=SCI-EXPANDED, SSCI, CPCI-S, CPCI-SSH Timespan=1900-2023*

#3 #2 OR #1

*Indexes=SCI-EXPANDED, SSCI, CPCI-S, CPCI-SSH Timespan=1900-2023*

#2 TS=("ventricular fibrillation" or "ventricular tachycardia" or "heart arrest" or "cardiac arrest" or "cardiopulmonary arrest" or "circulatory arrest" or "cardiac standstill" or "pulseless electrical activity" or pea or pulseless or shockable or non-shockable or nonshockable) AND TS=("out of hospital" or "out-of-hospital" or prehospital or "pre-hospital" or "pre hospital" or "emergency medical service\*" or "emergency medical technician\*" or paramedic\* or ambulance\* or ems or emt or field or HEMS)

*Indexes=SCI-EXPANDED, SSCI, CPCI-S, CPCI-SSH Timespan=1900-2023*

#1 **TOPIC:** ("out of hospital cardiac arrest" or "out-of-hospital cardiac arrest" or ohca)

*Indexes=SCI-EXPANDED, SSCI, CPCI-S, CPCI-SSH Timespan=1900-2023*

**eTable 7. Derivation Studies Paired Sensitivity and Specificity**

| Author (year)                          | TOR Rule     | Prevalence | Population                   | TP    | FP | FN    | TN   | Sensitivity [95% CI] | Specificity [95% CI] |
|----------------------------------------|--------------|------------|------------------------------|-------|----|-------|------|----------------------|----------------------|
| Morrison et al, <sup>1</sup> (2007)    | ALS          | 94.9%      | Adult (cardiac)              | 1425  | 0  | 3009  | 239  | 0.32 [0.31-0.34]     | 1.00 [0.98-1.00]     |
| Verbeek et al, <sup>2</sup> (2002)     | BLS          | 98.0%      | Adult (medical)              | 425   | 0  | 224   | 13   | 0.65 [0.62-0.69]     | 0.99 [0.74-1.00]     |
| Glober et al, <sup>3</sup> (2019)      | Glober 1     | 90.9%      | Adult (medical & trauma)     | 223   | 0  | 1327  | 156  | 0.14 [0.13-0.16]     | 1.00 [0.98-1.00]     |
| Goto et al, <sup>4</sup> (2019)        | Goto 1       | 95.8%      | Adult (EMS witnessed)        | 11069 | 21 | 90746 | 4434 | 0.11 [0.11-0.11]     | 1.00 [0.99-1.00]     |
| Haukoos et al, <sup>5</sup> (2004)     | Haukoos 1    | 95.2%      | Adult (medical)              | 487   | 3  | 231   | 33   | 0.68 [0.64-0.71]     | 0.92 [0.78-0.98]     |
| Jabre et al, <sup>6</sup> (2016)       | Jabre        | 89.5%      | Adult (cardiac)              | 2799  | 1  | 3435  | 728  | 0.45 [0.44-0.46]     | 1.00 [0.99-1.00]     |
| Yoon et al, <sup>7</sup> (2019)        | KoCARC 1     | 88.5%      | Adult (cardiac)              | 2037  | 40 | 1820  | 463  | 0.53 [0.51-0.54]     | 0.92 [0.89-0.94]     |
| Yoon et al, <sup>7</sup> (2019)        | KoCARC 2     | 88.5%      | Adult (cardiac)              | 2027  | 56 | 1830  | 447  | 0.53 [0.51-0.54]     | 0.89 [0.86-0.91]     |
| Yoon et al, <sup>7</sup> (2019)        | KoCARC 3     | 88.5%      | Adult (cardiac)              | 1512  | 25 | 2345  | 478  | 0.39 [0.38-0.41]     | 0.95 [0.93-0.97]     |
| Lee et al, <sup>8</sup> (2019)         | KoCARC 4     | 88.3%      | Adult (cardiac)              | 1245  | 14 | 2825  | 524  | 0.31 [0.29-0.32]     | 0.97 [0.96-0.99]     |
| Lee et al, <sup>8</sup> (2019)         | KoCARC 5     | 88.3%      | Adult (cardiac)              | 1316  | 11 | 2754  | 527  | 0.32 [0.31-0.34]     | 0.98 [0.96-0.99]     |
| Marsden et al, <sup>9</sup> (1995)     | Marsden      | 99.7%      | Adult (medical & trauma)     | 240   | 0  | 173   | 1    | 0.58 [0.53-0.63]     | 0.91 [0.02-1.00]     |
| House et al, <sup>10</sup> (2018)      | PEA          | 84.3%      | Adult (cardiac, transported) | 829   | 3  | 955   | 328  | 0.46 [0.44-0.49]     | 0.99 [0.97-1.00]     |
| Petrie et al, <sup>11</sup> (2001)     | Petrie       | 95.7%      | Adult (cardiac)              | 3720  | 7  | 5751  | 421  | 0.39 [0.38-0.40]     | 0.98 [0.97-0.99]     |
| SOS-Kanto, <sup>12</sup> (2017)        | SOS Kanto 1  | 95.2%      | Adult (medical & trauma)     | 6274  | 34 | 6385  | 598  | 0.50 [0.49-0.50]     | 0.95 [0.93-0.96]     |
| SOS-Kanto, <sup>12</sup> (2017)        | SOS Kanto 2  | 95.2%      | Adult (medical & trauma)     | 5609  | 17 | 7050  | 615  | 0.44 [0.43-0.45]     | 0.97 [0.96-0.98]     |
| SOS-Kanto, <sup>12</sup> (2017)        | SOS Kanto 3  | 95.2%      | Adult (medical & trauma)     | 5196  | 9  | 7463  | 623  | 0.41 [0.40-0.42]     | 0.99 [0.97-0.99]     |
| Shibahashi et al, <sup>13</sup> (2020) | Shibahashi 3 | 96.6%      | Child (trauma)               | 422   | 5  | 140   | 15   | 0.75 [0.71-0.79]     | 0.75 [0.51-0.91]     |
| Bonnin et al, <sup>14</sup> (1993)     | no ROSC      | 93.0%      | Adult (medical)              | 946   | 6  | 284   | 86   | 0.77 [0.74-0.79]     | 0.93 [0.86-0.98]     |
| Chiang et al, <sup>15</sup> (2016)     | tCPA         | 95.6%      | Adult (trauma)               | 147   | 0  | 707   | 39   | 0.17 [0.15-0.20]     | 1.00 [0.91-1.00]     |

True positive (TP) means TOR rule indicates stop and patient dies, False positive (FP) TOR rule indicates stop but patient survives (missed survivors) True negative (TN) TOR rule indicates continue and patient survives, False negative (FN) TOR rule indicates continue but patient dies (futile resuscitations) Sensitivity is proportion of cases where the TOR indicates stop out of all deaths. Specificity is proportion of cases where the TOR rule indicates continue out of all survivors.



**eTable 8. External Validation Studies Paired Sensitivity and Specificity**

| Author (year)                         | TOR Rule | Prevalence | Population                     | TP    | FP  | FN    | TN   | Sensitivity [95% CI] | Specificity [95% CI] |
|---------------------------------------|----------|------------|--------------------------------|-------|-----|-------|------|----------------------|----------------------|
| Cheong et al, <sup>16</sup> (2016)    | ALS      | 96.5%      | Adult (cardiac)                | 586   | 1   | 1531  | 75   | 0.28 [0.26-0.30]     | 0.99 [0.93-1.00]     |
| Chiang et al, <sup>17</sup> (2015)    | ALS      | 94.4%      | Adult (medical)                | 1896  | 48  | 1396  | 149  | 0.58 [0.56-0.59]     | 0.76 [0.69-0.81]     |
| Diskin et al, <sup>18</sup> (2014)    | ALS      | 87.9%      | Adult (cardiac)                | 75    | 0   | 208   | 39   | 0.27 [0.21-0.32]     | 1.00 [0.91-1.00]     |
| Fukada et al, <sup>19</sup> (2014)    | ALS      | 90.0%      | Adult (medical & trauma)       | 7     | 0   | 30    | 4    | 0.19 [0.08-0.35]     | 0.98 [0.38-1.00]     |
| House et al, <sup>10</sup> (2018)     | ALS      | 84.4%      | Adult (cardiac, transported)   | 102   | 0   | 1695  | 331  | 0.06 [0.05-0.07]     | 1.00 [0.99-1.00]     |
| Hreinsson et al, <sup>20</sup> (2020) | ALS      | 79.9%      | Adult (cardiac)                | 35    | 0   | 414   | 113  | 0.08 [0.05-0.11]     | 1.00 [0.97-1.00]     |
| Hsu et al, <sup>21</sup> (2022)       | ALS      | 94.0%      | Adult (medical)                | 25164 | 385 | 26613 | 2902 | 0.49 [0.48-0.49]     | 0.88 [0.87-0.89]     |
| Kajino et al, <sup>22</sup> (2013)    | ALS      | 96.0%      | Adult (cardiac)                | 40612 | 418 | 91919 | 5037 | 0.31 [0.30-0.31]     | 0.92 [0.92-0.93]     |
| Kashiura et al, <sup>23</sup> (2016)  | ALS      | 96.2%      | Adult (medical)                | 1681  | 20  | 4170  | 210  | 0.29 [0.28-0.30]     | 0.91 [0.87-0.95]     |
| Lee et al, <sup>8</sup> (2019)        | ALS      | 88.3%      | Adult (cardiac)                | 868   | 17  | 3202  | 521  | 0.21 [0.20-0.23]     | 0.97 [0.95-0.98]     |
| Lin et al, <sup>24</sup> (2022)       | ALS      | 93.6%      | Adult (2015 cohort)            | 122   | 2   | 231   | 22   | 0.35 [0.30-0.40]     | 0.92 [0.73-0.99]     |
| Lin et al, <sup>24</sup> (2022)       | ALS      | 94.1%      | Adult (2020 cohort)            | 104   | 0   | 279   | 24   | 0.27 [0.23-0.32]     | 1.00 [0.85-1.00]     |
| Matsui et al, <sup>25</sup> (2023)    | ALS      | 88.5%      | Child (medical & trauma)       | 299   | 21  | 1319  | 190  | 0.18 [0.17-0.20]     | 0.90 [0.85-0.94]     |
| Morrison et al, <sup>26</sup> (2009)  | ALS      | 94.6%      | Adult (cardiac)                | 743   | 0   | 1523  | 130  | 0.33 [0.31-0.35]     | 1.00 [0.97-1.00]     |
| Sasson et al, <sup>27</sup> (2008)    | ALS      | 92.9%      | Adult (cardiac)                | 1192  | 0   | 3921  | 392  | 0.23 [0.22-0.24]     | 1.00 [0.99-1.00]     |
| Skrifvars et al, <sup>28</sup> (2010) | ALS      | 98.9%      | Adult (medical, non-shockable) | 5464  | 2   | 15020 | 219  | 0.27 [0.26-0.27]     | 0.99 [0.97-1.00]     |
| Smits et al, <sup>29</sup> (2023)     | ALS      | 87.5%      | Adult (cardiac, male)          | 3834  | 6   | 15240 | 2728 | 0.20 [0.20-0.21]     | 1.00 [1.00-1.00]     |
| Smits et al, <sup>29</sup> (2023)     | ALS      | 92.9%      | Adult (cardiac, female)        | 2301  | 3   | 7704  | 764  | 0.23 [0.22-0.24]     | 1.00 [0.99-1.00]     |
| Verhaert et al, <sup>30</sup> (2016)  | ALS      | 84.8%      | Adult (medical)                | 35    | 0   | 464   | 89   | 0.07 [0.05-0.10]     | 1.00 [0.96-1.00]     |
| Chiang et al, <sup>17</sup> (2015)    | BLS      | 94.4%      | Adult (medical)                | 2105  | 51  | 1187  | 146  | 0.64 [0.62-0.66]     | 0.74 [0.67-0.80]     |
| Kim et al, <sup>31</sup> (2015)       | BLS      | 90.7%      | Adult (cardiac)                | 3224  | 137 | 1160  | 314  | 0.74 [0.72-0.75]     | 0.70 [0.65-0.74]     |
| Lee et al, <sup>8</sup> (2019)        | BLS      | 88.3%      | Adult (cardiac)                | 2921  | 118 | 1149  | 420  | 0.72 [0.70-0.73]     | 0.78 [0.74-0.81]     |
| Matsui et al, <sup>25</sup> (2023)    | BLS      | 85.3%      | Child (medical & trauma)       | 5474  | 440 | 869   | 657  | 0.86 [0.85-0.87]     | 0.60 [0.57-0.63]     |
| Ong et al, <sup>32</sup> (2006)       | BLS      | 95.4%      | Adult (cardiac)                | 6905  | 3   | 6143  | 633  | 0.53 [0.52-0.54]     | 1.00 [0.99-1.00]     |
| Ong et al, <sup>33</sup> (2007)       | BLS      | 98.6%      | Adult (medical)                | 1553  | 6   | 684   | 26   | 0.69 [0.67-0.71]     | 0.81 [0.64-0.93]     |
| Skrifvars et al, <sup>28</sup> (2010) | ERC      | 98.9%      | Adult (medical, non-shockable) | 19354 | 11  | 1130  | 210  | 0.94 [0.94-0.95]     | 0.95 [0.91-0.97]     |
| Glober et al, <sup>34</sup> (2020)    | Glober 1 | 91.5%      | Adult (medical & trauma)       | 290   | 0   | 3407  | 344  | 0.08 [0.07-0.09]     | 1.00 [0.99-1.00]     |
| Hsu et al, <sup>21</sup> (2022)       | Goto 1   | 94.0%      | Adult (medical)                | 27856 | 283 | 23921 | 3004 | 0.54 [0.53-0.54]     | 0.91 [0.90-0.92]     |
| Lee et al, <sup>8</sup> (2019)        | Goto 1   | 88.3%      | Adult (cardiac)                | 1579  | 27  | 2491  | 511  | 0.39 [0.37-0.40]     | 0.95 [0.93-0.97]     |

**eTable 8. External Validation Studies Paired Sensitivity and Specificity**

| Author (year)                         | TOR Rule     | Prevalence | Population                     | TP     | FP   | FN    | TN   | Sensitivity [95% CI] | Specificity [95% CI] |
|---------------------------------------|--------------|------------|--------------------------------|--------|------|-------|------|----------------------|----------------------|
| SOS-Kanto, <sup>12</sup> (2017)       | Goto 2       | 95.2%      | Adult (medical & trauma)       | 6319   | 33   | 6340  | 599  | 0.50 [0.49-0.51]     | 0.95 [0.93-0.96]     |
| Skrifvars et al, <sup>28</sup> (2010) | Helsinki     | 98.9%      | Adult (medical, non-shockable) | 11258  | 57   | 9226  | 164  | 0.55 [0.54-0.56]     | 0.74 [0.68-0.80]     |
| Hreinsson et al, <sup>20</sup> (2020) | Jabre        | 80.1%      | Adult (cardiac)                | 215    | 0    | 240   | 113  | 0.47 [0.43-0.52]     | 1.00 [0.97-1.00]     |
| Park et al, <sup>35</sup> (2023)      | KoCARC 1     | 93.4%      | Adult (medical)                | 668    | 7    | 1039  | 113  | 0.39 [0.37-0.41]     | 0.94 [0.88-0.98]     |
| Park et al, <sup>35</sup> (2023)      | KoCARC 2     | 93.4%      | Adult (medical)                | 687    | 11   | 1020  | 109  | 0.40 [0.38-0.43]     | 0.91 [0.84-0.95]     |
| Park et al, <sup>35</sup> (2023)      | KoCARC 3     | 93.4%      | Adult (medical)                | 524    | 6    | 1183  | 114  | 0.31 [0.29-0.33]     | 0.95 [0.89-0.98]     |
| Harris et al, <sup>36</sup> (2021)    | MIEMS        | 71.0%      | Child (trauma, age 0-17)       | 27     | 4    | 71    | 36   | 0.28 [0.19-0.37]     | 0.90 [0.76-0.97]     |
| Harris et al, <sup>36</sup> (2021)    | MIEMS        | 73.0%      | Child (trauma, age 0-14)       | 39     | 4    | 107   | 50   | 0.27 [0.20-0.35]     | 0.93 [0.82-0.98]     |
| Harris (2021)                         | MIEMS        | 76.8%      | Child (medical, age 0-17)      | 44     | 1    | 1028  | 322  | 0.04 [0.03-0.05]     | 1.00 [0.98-1.00]     |
| Ong et al, <sup>32</sup> (2006)       | Marsden      | 95.4%      | Adult (cardiac)                | 2535   | 1    | 10513 | 635  | 0.19 [0.19-0.20]     | 1.00 [0.99-1.00]     |
| Ong et al, <sup>33</sup> (2007)       | Marsden      | 98.6%      | Adult (medical)                | 1447   | 3    | 790   | 29   | 0.65 [0.63-0.67]     | 0.91 [0.75-0.98]     |
| Cone et al, <sup>37</sup> (2005)      | NAEMSP       | 97.6%      | Adult (medical)                | 285    | 0    | 204   | 12   | 0.58 [0.54-0.63]     | 0.99 [0.72-1.00]     |
| Ong et al, <sup>32</sup> (2006)       | Petrie       | 95.4%      | Adult (cardiac)                | 1292   | 1    | 11756 | 635  | 0.10 [0.09-0.10]     | 1.00 [0.99-1.00]     |
| Ong et al, <sup>33</sup> (2007)       | Petrie       | 98.6%      | Adult (medical)                | 716    | 2    | 1521  | 30   | 0.32 [0.30-0.34]     | 0.94 [0.79-0.99]     |
| Lee et al, <sup>8</sup> (2019)        | SOS Kanto 1  | 88.3%      | Adult (cardiac)                | 1102   | 9    | 2968  | 529  | 0.27 [0.26-0.28]     | 0.98 [0.97-0.99]     |
| Grunau et al, <sup>38</sup> (2019)    | Shibahashi 1 | 90.7%      | Adult (medical)                | 5378   | 64   | 18090 | 2343 | 0.23 [0.22-0.23]     | 0.97 [0.97-0.98]     |
| Hsu et al, <sup>21</sup> (2022)       | Shibahashi 1 | 94.0%      | Adult (medical)                | 18122  | 191  | 33655 | 3096 | 0.35 [0.35-0.35]     | 0.94 [0.93-0.95]     |
| Cheong et al, <sup>16</sup> (2016)    | uTOR         | 96.5%      | Adult (cardiac)                | 1406   | 5    | 711   | 71   | 0.66 [0.64-0.68]     | 0.93 [0.85-0.98]     |
| Drennan et al, <sup>39</sup> (2014)   | uTOR         | 97.7%      | Adult (cardiac)                | 2471   | 15   | 3234  | 122  | 0.43 [0.42-0.45]     | 0.89 [0.83-0.94]     |
| Fukada et al, <sup>19</sup> (2014)    | uTOR         | 95.9%      | Adult (medical & trauma)       | 100    | 1    | 42    | 5    | 0.70 [0.62-0.78]     | 0.83 [0.36-1.00]     |
| Goto et al, <sup>4</sup> (2019)       | uTOR         | 95.8%      | Adult (EMS witnessed)          | 92581  | 1714 | 9234  | 2741 | 0.91 [0.91-0.91]     | 0.62 [0.60-0.63]     |
| Grunau et al, <sup>40</sup> (2017)    | uTOR         | 85.1%      | Adult (medical)                | 4275   | 92   | 1674  | 953  | 0.72 [0.71-0.73]     | 0.91 [0.89-0.93]     |
| House et al, <sup>10</sup> (2018)     | uTOR         | 84.5%      | Adult (cardiac, transported)   | 582    | 0    | 1226  | 331  | 0.32 [0.30-0.34]     | 1.00 [0.99-1.00]     |
| Hreinsson et al, <sup>20</sup> (2020) | uTOR         | 80.1%      | Adult (cardiac)                | 202    | 0    | 252   | 113  | 0.44 [0.40-0.49]     | 1.00 [0.97-1.00]     |
| Hsu et al, <sup>21</sup> (2022)       | uTOR         | 94.0%      | Adult (medical)                | 40904  | 657  | 10873 | 2630 | 0.79 [0.79-0.79]     | 0.80 [0.79-0.81]     |
| Jordan et al, <sup>41</sup> (2017)    | uTOR         | 81.9%      | Adult (medical)                | 22     | 0    | 69    | 20   | 0.24 [0.16-0.34]     | 1.00 [0.82-1.00]     |
| Kajino et al, <sup>22</sup> (2013)    | uTOR         | 93.7%      | Adult (cardiac)                | 111980 | 1160 | 29656 | 8356 | 0.79 [0.79-0.79]     | 0.88 [0.87-0.88]     |
| Kashiura et al, <sup>23</sup> (2016)  | uTOR         | 93.7%      | Adult (medical)                | 4165   | 28   | 917   | 314  | 0.82 [0.81-0.83]     | 0.92 [0.88-0.94]     |
| Lin et al, <sup>24</sup> (2022)       | uTOR         | 96.4%      | Adult (2015 cohort)            | 738    | 19   | 113   | 13   | 0.87 [0.84-0.89]     | 0.41 [0.24-0.59]     |
| Lin et al, <sup>24</sup> (2022)       | uTOR         | 95.5%      | Adult (2020 cohort)            | 430    | 8    | 116   | 18   | 0.79 [0.75-0.82]     | 0.69 [0.48-0.86]     |

**eTable 8. External Validation Studies Paired Sensitivity and Specificity**

| Author (year)                         | TOR Rule      | Prevalence | Population               | TP   | FP | FN   | TN  | Sensitivity [95% CI] | Specificity [95% CI] |
|---------------------------------------|---------------|------------|--------------------------|------|----|------|-----|----------------------|----------------------|
| Morrison et al, <sup>26</sup> (2009)  | uTOR          | 94.6%      | Adult (cardiac)          | 1302 | 0  | 964  | 130 | 0.57 [0.55-0.60]     | 1.00 [0.97-1.00]     |
| Morrison et al, <sup>1</sup> (2007)   | uTOR          | 94.9%      | Adult (cardiac)          | 2263 | 0  | 2171 | 239 | 0.51 [0.50-0.53]     | 1.00 [0.98-1.00]     |
| Park et al, <sup>35</sup> (2023)      | uTOR          | 93.4%      | Adult (medical)          | 877  | 14 | 830  | 106 | 0.51 [0.49-0.54]     | 0.88 [0.81-0.93]     |
| Sasson et al, <sup>27</sup> (2008)    | uTOR          | 92.9%      | Adult (cardiac)          | 2587 | 5  | 2526 | 387 | 0.51 [0.49-0.52]     | 0.99 [0.97-1.00]     |
| SOS-Kanto, <sup>12</sup> (2017)       | uTOR          | 95.2%      | Adult (medical & trauma) | 9892 | 72 | 2767 | 560 | 0.78 [0.77-0.79]     | 0.89 [0.86-0.91]     |
| Yates et al, <sup>42</sup> (2018)     | uTOR          | 98.6%      | Adult (transported)      | 83   | 0  | 134  | 3   | 0.38 [0.32-0.45]     | 0.97 [0.28-1.00]     |
| Yoon et al, <sup>7</sup> (2019)       | uTOR          | 88.5%      | Adult (cardiac)          | 2704 | 97 | 1153 | 406 | 0.70 [0.69-0.72]     | 0.81 [0.77-0.84]     |
| Hreinsson et al, <sup>20</sup> (2020) | uTOR OR Jabre | 80.1%      | Adult (cardiac)          | 270  | 0  | 184  | 113 | 0.59 [0.55-0.64]     | 1.00 [0.97-1.00]     |

True positive (TP) means TOR rule indicates stop and patient dies, False positive (FP) TOR rule indicates stop but patient survives (missed survivors) True negative (TN) TOR rule indicates continue and patient survives, False negative (FN) TOR rule indicates continue but patient dies (futile resuscitations) Sensitivity is proportion of cases where the TOR indicates stop out of all deaths. Specificity is proportion of cases where the TOR rule indicates continue out of all survivors.

**eTable 9. Clinical Studies Paired Sensitivity and Specificity**

| Author (year)                        | TOR Rule | Prevalence | Population      | TP  | FP | FN  | TN | Sensitivity [95% CI] | Specificity [95% CI] |
|--------------------------------------|----------|------------|-----------------|-----|----|-----|----|----------------------|----------------------|
| Morrison et al, <sup>43</sup> (2014) | BLS      | 95.4%      | Adult (medical) | 586 | 0  | 323 | 44 | 0.64 [0.61-0.68]     | 1.00 [0.92-1.00]     |

True positive (TP) means TOR rule indicates stop and patient dies, False positive (FP) TOR rule indicates stop but patient survives (missed survivors) True negative (TN) TOR rule indicates continue and patient survives, False negative (FN) TOR rule indicates continue but patient dies (futile resuscitations) Sensitivity is proportion of cases where the TOR indicates stop out of all deaths. Specificity is proportion of cases where the TOR rule indicates continue out of all survivors.

**eTable 10. Summary of Included Studies**

| Author (year), country                        | Study type<br>TOR rule (n)                                 | Population                                                                                                                                                                                                                                                                                                                         | EMS system                                                                                                                                                                                                                                               |
|-----------------------------------------------|------------------------------------------------------------|------------------------------------------------------------------------------------------------------------------------------------------------------------------------------------------------------------------------------------------------------------------------------------------------------------------------------------|----------------------------------------------------------------------------------------------------------------------------------------------------------------------------------------------------------------------------------------------------------|
| Bonnin et al, <sup>14</sup> (1993), USA       | Derivation study<br>No ROSC TOR (n=1322)                   | Retrospective analysis of city of Houston cardiac arrest registry. Excluded patient groups: <ul style="list-style-type: none"> <li>• Obviously deceased</li> <li>• Age &lt; 18</li> <li>• Persistent VF</li> <li>• Trauma aetiology</li> <li>• Hypothermia</li> <li>• Primary respiratory aetiology</li> <li>• Overdose</li> </ul> | Tiered EMS system. BLS first response with paramedic ALS secondary response                                                                                                                                                                              |
| Cheong et al, <sup>16</sup> (2016), Singapore | Validation study<br>BLS TOR (n=2193)**<br>ALS TOR (n=2193) | Retrospective analysis of all OHCA patients transported by EMS to 7 EDs participating in the PAROS study. Excluded patient groups: <ul style="list-style-type: none"> <li>• Obviously deceased</li> <li>• Age &lt; 18</li> <li>• DNACPR</li> <li>• Non-cardiac aetiology</li> </ul>                                                | Single tier EMS system. EMTs provide intermediate life support including AED, LMA, IV adrenaline. No manual defibrillation, no ETI, no amiodarone/lignocaine                                                                                             |
| Chiang et al, <sup>17</sup> (2015), Taiwan    | Validation study<br>BLS TOR (n=3489)**<br>ALS TOR (n=3489) | Retrospective analysis of city of Taipei Fire Department cardiac arrest registry. Excluded patient groups: <ul style="list-style-type: none"> <li>• Obviously deceased</li> <li>• DNACPR</li> <li>• Age &lt; 18</li> <li>• Trauma aetiology</li> </ul>                                                                             | Mixed EMS response may include BLS only, ALS only or mixed BLS/ALS. BLS level providers can provide defibrillation, while ALS providers can perform ETI and administer ACLS medications                                                                  |
| Chiang et al, <sup>15</sup> (2016), Taiwan    | Derivation study<br>tCPA TOR (n=893)                       | Retrospective analysis of city of Taipei Fire Department cardiac arrest registry. Excluded patient groups: <ul style="list-style-type: none"> <li>• Obviously deceased</li> <li>• DNACPR</li> <li>• Age &lt; 18</li> <li>• Non-trauma aetiology</li> </ul>                                                                         | Not reported. However, a prior study <sup>xx</sup> by the same author, using the same registry, indicates a mixed EMS response that may include BLS only, ALS only or mixed BLS/ALS. BLS level providers can provide defibrillation, while ALS providers |

|                                             |                                                         |                                                                                                                                                                                                                                                                                                                                                                                                                                                                                             |                                                                                                                                                                                                                                                                                                                                                                                      |
|---------------------------------------------|---------------------------------------------------------|---------------------------------------------------------------------------------------------------------------------------------------------------------------------------------------------------------------------------------------------------------------------------------------------------------------------------------------------------------------------------------------------------------------------------------------------------------------------------------------------|--------------------------------------------------------------------------------------------------------------------------------------------------------------------------------------------------------------------------------------------------------------------------------------------------------------------------------------------------------------------------------------|
|                                             |                                                         | Note – FBAO and intoxication classified as non-blunt injury and conflated as penetrating trauma                                                                                                                                                                                                                                                                                                                                                                                             | can perform ETI and administer ACLS medications                                                                                                                                                                                                                                                                                                                                      |
| Cone et al, <sup>37</sup> (2005), USA       | Validation study<br>NAEMSP TOR (n=501)                  | Both prospective and retrospective data utilised. Retrospective data from a single hospital database. Prospective data collected at two hospitals (one of which provided the retrospective data). Excluded patient groups: <ul style="list-style-type: none"> <li>• DNACPR</li> <li>• Age &lt; 18</li> <li>• Hypothermia</li> <li>• Cold- water drowning</li> </ul>                                                                                                                         | Fire base ALS first response with BLS or ALS EMS transport                                                                                                                                                                                                                                                                                                                           |
| Diskin et al, <sup>18</sup> (2014), USA     | Validation study<br>ALS TOR (n=322)                     | Retrospective analysis of Richmond EMS cardiac arrest records. Excluded patient groups: <ul style="list-style-type: none"> <li>• Obviously deceased</li> <li>• DNACPR</li> <li>• Age &lt;18</li> <li>• Non-cardiac aetiology</li> <li>• Trauma aetiology</li> <li>• Pregnant</li> </ul>                                                                                                                                                                                                     | Single tier ALS EMS system. Intra arrest management included an aggressive vasopressor regimen combining both adrenaline and vasopressin, cold saline infusion and mechanical CPR (Autopulse).                                                                                                                                                                                       |
| Drennan et al, <sup>39</sup> (2014), Canada | Validation study<br>uTOR (n=5842)                       | Retrospective analysis of the Toronto Resuscitation Outcomes Consortium (ROC) Epistry database. Only patients transported (not terminated on scene due to futility) were included. Excluded patient groups: <ul style="list-style-type: none"> <li>• Obviously deceased</li> <li>• DNACPR</li> <li>• Terminated on scene (futile)</li> <li>• Age &lt;18</li> <li>• Non-cardiac aetiology</li> <li>• Trauma aetiology</li> <li>• Drowning</li> <li>• Asphyxia</li> <li>• Overdose</li> </ul> | Mixed BLS and ALS EMS system with existing termination of resuscitation protocol. Nearest ambulance assigned; all cardiac arrest cases assigned an ALS ambulance if BLS resource is closest. BLS level providers can provide semi-automatic defibrillation and King airway, while ALS providers can perform manual defibrillation, ETI, IV/IO access and administer ACLS medications |
| Fukada et al, <sup>19</sup> (2014), Japan   | Validation study<br>BLS TOR (n=148)**<br>ALS TOR (n=41) | Retrospective analysis of cases transported to University of Tokyo Hospital. Excluded patient groups:                                                                                                                                                                                                                                                                                                                                                                                       | Single tier EMS system. EMTs can provide defibrillation, ETI, IV access, IV infusion, IV adrenaline                                                                                                                                                                                                                                                                                  |

- Age < 18

|                                            |                                                                                        |                                                                                                                                                                                                                         |                                                                                                                                                                                                                                                        |
|--------------------------------------------|----------------------------------------------------------------------------------------|-------------------------------------------------------------------------------------------------------------------------------------------------------------------------------------------------------------------------|--------------------------------------------------------------------------------------------------------------------------------------------------------------------------------------------------------------------------------------------------------|
| Glober et al, <sup>3</sup> (2019), USA     | Derivation study<br>Glob 1 TOR (n=1706)                                                | Retrospective analysis of cases attended by San Mateo County EMS using data reported to the CARES registry. No excluded patient groups reported.                                                                        | ALS EMS system                                                                                                                                                                                                                                         |
| Glober et al, <sup>34</sup> (2020), USA    | Validation study<br>Glob 1 TOR (n=4041)                                                | Retrospective analysis of cases in Marion County, Indiana attended by Indianapolis EMS using routinely collected data.<br>Excluded patient groups: <ul style="list-style-type: none"> <li>• Age &lt; 18</li> </ul>      | ALS EMS system                                                                                                                                                                                                                                         |
| Goto et al, <sup>4</sup> (2019), Japan     | Derivation study<br>Goto 1 TOR (RIP, n=106270)<br>Validation study<br>BLS (n=106270)** | Retrospective analysis of National FDMA database. Excluded patient groups: <ul style="list-style-type: none"> <li>• EMS witnessed cardiac arrest</li> <li>• Age &lt; 18</li> </ul>                                      | Single tier EMS system. EMT level providers can provide defibrillation, airway adjunct insertion, IV access, IV infusion. ALS providers can perform ETI and administer adrenaline. EMS personnel cannot legally terminate resuscitation                |
| Grunau et al, <sup>40</sup> (2017), Canada | Validation study<br>uTOR (n=6994)                                                      | Prospectively collected data in four metropolitan regions of British Columbia.<br>Excluded patient groups: <ul style="list-style-type: none"> <li>• DNACPR</li> <li>• Age &lt;18</li> <li>• Trauma aetiology</li> </ul> | Tiered response. Fire first responders supported by EMS ALS secondary response. First responders can provide defibrillation using an AED. ALS responders can provide manual defib, ETI, cricothyroidotomy, IV & IO access, IV fluids, ACLS medications |

|                                            |                                                                                                                        |                                                                                                                                                                                                                                                                                                                                                                                                                                                                                                                                                                                                             |                |
|--------------------------------------------|------------------------------------------------------------------------------------------------------------------------|-------------------------------------------------------------------------------------------------------------------------------------------------------------------------------------------------------------------------------------------------------------------------------------------------------------------------------------------------------------------------------------------------------------------------------------------------------------------------------------------------------------------------------------------------------------------------------------------------------------|----------------|
| Grunau et al, <sup>38</sup> (2019), Canada | Validation study<br>Shibahashi 1 TOR<br>(n=25875)                                                                      | Secondary analysis of patients recruited to the Resuscitation Outcomes Consortium continuous versus interrupted chest compressions (CCC) trial. Excluded patient groups: <ul style="list-style-type: none"> <li>• EMS-witnessed arrest</li> <li>• DNACPR</li> <li>• Trauma Aetiology</li> <li>• Uncontrolled bleeding or exsanguination</li> <li>• Asphyxia</li> <li>• Pregnant</li> <li>• Pre-existing tracheostomy</li> <li>• Prisoners</li> <li>• Mechanical chest compression device</li> <li>• Advanced airway management before EMS arrival</li> <li>• Opted out of resuscitation research</li> </ul> | ALS EMS system |
| Harris et al, <sup>36</sup> (2021), USA    | Validation study<br>MIEMS Medical (<18)<br>(n=1,395)<br>MIEMS Trauma (<18)<br>(n=200)<br>MIEMS Trauma (<15)<br>(n=138) | Retrospective analysis of cases within Electronic Health Records. Excluded patient groups: <ul style="list-style-type: none"> <li>• Adult</li> <li>• Interfacility transports</li> </ul>                                                                                                                                                                                                                                                                                                                                                                                                                    | ALS EMS system |
| Haukoos et al, <sup>5</sup> (2004), USA    | Derivation study<br>Haukoos 1 TOR (n=754)                                                                              | Retrospective analysis of cases transported to a single hospital. Excluded patient groups: <ul style="list-style-type: none"> <li>• Age &lt;18</li> <li>• Trauma aetiology</li> </ul>                                                                                                                                                                                                                                                                                                                                                                                                                       | ALS EMS system |
| House et al, <sup>10</sup> (2018), UK      | Derivation study<br>PEA TOR (n=2,115)<br>Validation study<br>BLS (n=2,139)**<br>ALS TOR (n=2,128)                      | Retrospective analysis of cases transported by a single EMS.                                                                                                                                                                                                                                                                                                                                                                                                                                                                                                                                                | ALS EMS system |
|                                            | Validation study                                                                                                       |                                                                                                                                                                                                                                                                                                                                                                                                                                                                                                                                                                                                             | ALS EMS system |

|                                                |                                                                                                        |                                                                                                                                                                                                                                                                                                                      |                                                                                                                                                                                                                                         |
|------------------------------------------------|--------------------------------------------------------------------------------------------------------|----------------------------------------------------------------------------------------------------------------------------------------------------------------------------------------------------------------------------------------------------------------------------------------------------------------------|-----------------------------------------------------------------------------------------------------------------------------------------------------------------------------------------------------------------------------------------|
| Hreinsson et al, <sup>20</sup> (2020), Iceland | BLS (n=568)**<br>ALS TOR (n=568)<br>Jabre TOR (n=568)<br>BLS or Jabre TOR (n=568) **                   | Retrospective analysis of VAKI database.<br>Excluded patient groups: <ul style="list-style-type: none"> <li>• Age &lt; 18</li> <li>• Obviously deceased</li> <li>• DNACPR</li> <li>• Non-cardiac aetiology</li> <li>• Outside Reykjavik metropolitan area</li> </ul>                                                 |                                                                                                                                                                                                                                         |
| Hsu et al, <sup>21</sup> (2022), Taiwan        | Validation study<br>BLS (n=55,064)**<br>ALS (n=55,064)<br>Goto 2 (n=55,064)<br>Shibahashi 1 (n=55,064) | Retrospective analysis of PAROS database.<br>Excluded patient groups: <ul style="list-style-type: none"> <li>• Age &lt; 18</li> <li>• Non-EMS transported</li> <li>• Obviously deceased</li> <li>• DNACPR</li> <li>• Trauma</li> <li>• Missing data</li> </ul>                                                       |                                                                                                                                                                                                                                         |
| Jabre et al, <sup>6</sup> (2016), France       | Derivation study<br>Jabre (n=6,963)                                                                    | Retrospective analysis <ul style="list-style-type: none"> <li>• Age &lt;18</li> <li>• Non-cardiac cause</li> <li>• Terminal illness</li> <li>• DNACPR</li> </ul>                                                                                                                                                     | Analysis of data from PRESENCE study and King County data. In Paris EMS response included physicians. In the USA there was a tiered ALS response.                                                                                       |
| Jordan et al, <sup>41</sup> (2017), USA        | Validation study<br>uTOR (n=111)                                                                       | Retrospective analysis of cases transported to a single hospital. Excluded patient groups: <ul style="list-style-type: none"> <li>• Obviously deceased</li> <li>• DNACPR</li> <li>• Trauma aetiology</li> <li>• Hanging</li> <li>• Drowning</li> </ul>                                                               | 14 EMS agencies with a mix of response models. Participating clinicians include 35 Paramedics, 256 AEMTs, 240 EMTs, and 27 Emergency Medical Responders.                                                                                |
| Kajino et al, <sup>22</sup> (2013), Japan      | Validation study<br>BLS (n=151152)**<br>ALS TOR (n=137986)                                             | Retrospective analysis of National FDMA database. Excluded patient groups: <ul style="list-style-type: none"> <li>• Age &lt; 18</li> <li>• Non-cardiac aetiology</li> <li>• Cerebrovascular aetiology</li> <li>• Respiratory aetiology</li> <li>• Asphyxia</li> <li>• Hanging</li> <li>• Malignant tumour</li> </ul> | Single tier EMS system. EMT level providers can provide defibrillation, airway adjunct insertion, IV access, IV infusion. ALS providers can perform ETI and administer adrenaline. EMS personnel cannot legally terminate resuscitation |



|                                             |                                                                                                                                                                                         |                                                                                                                                                                                                                                                                                                                                                                                                                                                                     |                                                                                                                                                                        |                                                                                                                                                                                                                                         |
|---------------------------------------------|-----------------------------------------------------------------------------------------------------------------------------------------------------------------------------------------|---------------------------------------------------------------------------------------------------------------------------------------------------------------------------------------------------------------------------------------------------------------------------------------------------------------------------------------------------------------------------------------------------------------------------------------------------------------------|------------------------------------------------------------------------------------------------------------------------------------------------------------------------|-----------------------------------------------------------------------------------------------------------------------------------------------------------------------------------------------------------------------------------------|
| Kashiura et al, <sup>23</sup> (2016), Japan | Validation study<br>BLS TOR (n=5,424) **<br>ALS TOR <sup>b</sup> (n=6,081)                                                                                                              | <ul style="list-style-type: none"> <li>• Trauma aetiology</li> </ul>                                                                                                                                                                                                                                                                                                                                                                                                | Retrospective analysis of National FDMA database. Excluded patient groups: <ul style="list-style-type: none"> <li>• Age &lt; 18</li> <li>• Trauma aetiology</li> </ul> | Single tier EMS system. EMT level providers can provide defibrillation, airway adjunct insertion, IV access, IV infusion. ALS providers can perform ETI and administer adrenaline. EMS personnel cannot legally terminate resuscitation |
| Kim et al, <sup>31</sup> (2015), Korea      | Validation study<br>BLS TOR (n=4,835)                                                                                                                                                   | Retrospective analysis of cases attended by Seoul Metropolitan Fire Department (SMFD). Excluded patient groups: <ul style="list-style-type: none"> <li>• Age &lt; 19</li> <li>• Non-cardiac aetiology</li> </ul>                                                                                                                                                                                                                                                    | Single tier BLS EMS system                                                                                                                                             | Single tier BLS EMS system                                                                                                                                                                                                              |
| Lee et al, <sup>8</sup> (2019), Korea       | Derivation study<br>KoCARC 4 TOR (n=4,608)<br>KoCARC 5 TOR (n=4,608)<br>Validation study<br>BLS TOR (n=4,608)<br>ALS TOR (n=4,608)<br>Goto 1 TOR (n=4,608)<br>SOS-Kanto 1 TOR (n=4,608) | Retrospective analysis of Korean nationwide registry. Excluded patient groups: <ul style="list-style-type: none"> <li>• Obviously deceased</li> <li>• Age &lt; 18</li> <li>• Terminal illness/hospice care/DNAR</li> <li>• Non-cardiac aetiology</li> <li>• Pregnant</li> <li>• Trauma aetiology</li> <li>• Electrocutation</li> <li>• Hypothermia</li> <li>• Primary respiratory aetiology</li> <li>• Drowning</li> <li>• Asphyxia</li> <li>• Poisoning</li> </ul> | Not defined. EMS personnel cannot legally terminate resuscitation and can use a manual defibrillator.                                                                  | Not defined. EMS personnel cannot legally terminate resuscitation and can use a manual defibrillator.                                                                                                                                   |
| Lin et al, <sup>24</sup> (2022), Taiwan     | Validation study<br>BLS (n=883) (2015 cohort)<br>BLS (n=572) (2020 cohort)<br>ALS (n=377) (2015 cohort)<br>ALS (n=407) (2020 cohort)                                                    | Restrospective analysis. Excluded patient groups: <ul style="list-style-type: none"> <li>• Age &lt; 18</li> <li>• Obviously deceased</li> <li>• DNACPR</li> <li>• Trauma</li> </ul>                                                                                                                                                                                                                                                                                 | Two tiered EMS system. BLS rule applied by BLS crews, ALS rule applied by ALS crews                                                                                    | Two tiered EMS system. BLS rule applied by BLS crews, ALS rule applied by ALS crews                                                                                                                                                     |

|                                              |                                                            |                                                                                                                                                                                                                                                                                                                                                                                      |                                                                                                                                                                                                     |
|----------------------------------------------|------------------------------------------------------------|--------------------------------------------------------------------------------------------------------------------------------------------------------------------------------------------------------------------------------------------------------------------------------------------------------------------------------------------------------------------------------------|-----------------------------------------------------------------------------------------------------------------------------------------------------------------------------------------------------|
| Marsden et al, <sup>9</sup> (1995), UK       | Derivation study<br>Marsden TOR (n=414)                    | Retrospective analysis of HeartStart Scotland database. Excluded patient groups: <ul style="list-style-type: none"> <li>• Obviously deceased</li> <li>• Age &lt; 18</li> <li>• Pregnant</li> <li>• Poisoning or overdose</li> <li>• Hypothermia</li> <li>• Drowning</li> </ul>                                                                                                       | Single tier ALS EMS system                                                                                                                                                                          |
| Matsui et al, <sup>25</sup> (2023)           | Validation study<br>BLS TOR (n=7,440)<br>ALS TOR (n=1,829) | Retrospective analysis of FDMA registry. Excluded patient groups: <ul style="list-style-type: none"> <li>• Age &gt; 17</li> <li>• Obviously deceased</li> </ul>                                                                                                                                                                                                                      | ALS capable EMS system. The BLS rule was applied to patients who received BLS level care only (irrespective of provider training). The ALS rule was applied to patients who received ALS level care |
| Morrison et al, <sup>1</sup> (2007), Canada  | Validation study<br>BLS TOR (n=4,673)<br>ALS TOR (n=4,673) | Retrospective analysis of OPALS study database (phase III - ALS). Excluded patient groups: <ul style="list-style-type: none"> <li>• Non-cardiac aetiology (including trauma, drowning, poisoning, hypothermia)</li> <li>• Obviously deceased (rigor mortis, lividity, decomposition, decapitation)</li> <li>• Age &lt; 16</li> <li>• DNACPR</li> </ul>                               | ALS system                                                                                                                                                                                          |
| Morrison et al, <sup>26</sup> (2009), Canada | Validation study<br>ALS TOR (n=2,396)<br>uTOR (n=2,396)    | Retrospective analysis of the Toronto Resuscitation Outcomes Consortium (ROC) Epistry database. Excluded patient groups: <ul style="list-style-type: none"> <li>• Non-cardiac aetiology (including trauma, drowning, poisoning, hypothermia)</li> <li>• Obviously deceased (rigor mortis, lividity, decomposition, decapitation)</li> <li>• Age &lt; 16</li> <li>• DNACPR</li> </ul> | Tiered response involving police, fire and EMTs with AEDs. Some regions also had ALS paramedics as part of the response.                                                                            |
|                                              | Clinical study                                             |                                                                                                                                                                                                                                                                                                                                                                                      |                                                                                                                                                                                                     |

|                                                 |                                                                                                      |                                                                                                                                                                                                                                                                                                                                                                                                                  |                                                                                                                                                     |
|-------------------------------------------------|------------------------------------------------------------------------------------------------------|------------------------------------------------------------------------------------------------------------------------------------------------------------------------------------------------------------------------------------------------------------------------------------------------------------------------------------------------------------------------------------------------------------------|-----------------------------------------------------------------------------------------------------------------------------------------------------|
| Morrison et al, <sup>43</sup> (2014),<br>Canada | BLS TOR (n=953)                                                                                      | Prospective analysis of consecutive cardiac arrest patients within the TORIT trial in seven regions of Ontario. Excluded patient groups: <ul style="list-style-type: none"> <li>• Received ACLS</li> <li>• Obviously deceased (rigor mortis, lividity, decomposition, decapitation)</li> <li>• Arrest from an obvious cause (e.g. hanging, drowning, trauma)</li> <li>• Age &lt; 16</li> <li>• DNACPR</li> </ul> | Mixed EMS system. Only BLS level cases included. Decision to stop after consultation with base physician that occurred following 4x2 minute cycles. |
| Ong et al, <sup>32</sup> (2006), Canada         | Validation study<br>BLS TOR (n=13,684)<br>Marsden TOR (n=13,684)<br>Petrie TOR (n=13,684)            | Retrospective analysis of OPALS study database (phase II & III – BLS cases only). Excluded patient groups: <ul style="list-style-type: none"> <li>• Obviously deceased (rigor mortis, lividity, decomposition, decapitation)</li> <li>• Age &lt; 16</li> <li>• DNACPR</li> <li>• Non-cardiac aetiology (including trauma, drowning, poisoning, hypothermia)</li> <li>• Received ALS on scene</li> </ul>          | Tiered EMS system. Only BLS level cases included.                                                                                                   |
| Ong et al, <sup>33</sup> (2007), Singapore      | Validation study<br>BLS TOR (n=2,269)<br>Marsden TOR (n=2,269)<br>Petrie TOR (n=2,269)               | Retrospective analysis of CARE database. Excluded patient groups: <ul style="list-style-type: none"> <li>• Obviously deceased (rigor mortis, lividity, decomposition, decapitation)</li> </ul>                                                                                                                                                                                                                   | Single tier EMS system. EMTs can provide defibrillation using AEDs.                                                                                 |
| Park et al, <sup>35</sup> (2023), Japan         | Validation study<br>uTOR (n=1,827)<br>KOCARC 1 (n=1,827)<br>KOCARC 2 (n=1,827)<br>KOCARC 3 (n=1,827) | Retrospective analysis. Excluded patient groups: <ul style="list-style-type: none"> <li>• Age &lt; 18</li> <li>• Trauma, intoxication, or drowning,</li> <li>• Obviously deceased</li> <li>• DNACPR</li> </ul>                                                                                                                                                                                                   | ALS capable EMS system. Majority of crews were BLS or ILS capable. Few ALS crews.                                                                   |

|                                               |                                                                                         |                                                                                                                                                                                                                                                                                                                                                                                                 |                                                                                                                                                                                                                                                        |
|-----------------------------------------------|-----------------------------------------------------------------------------------------|-------------------------------------------------------------------------------------------------------------------------------------------------------------------------------------------------------------------------------------------------------------------------------------------------------------------------------------------------------------------------------------------------|--------------------------------------------------------------------------------------------------------------------------------------------------------------------------------------------------------------------------------------------------------|
| Petrie et al, <sup>11</sup> (2001), Canada    | Derivation study<br>Petrie TOR (n=9,899)                                                | Retrospective analysis of OPALS study database (phase I & II – BLS only). Excluded patient groups: <ul style="list-style-type: none"> <li>• Obviously deceased (rigor mortis, lividity, decomposition, decapitation)</li> <li>• Age &lt; 16</li> <li>• DNACPR</li> <li>• Non-cardiac aetiology (including trauma, drowning, poisoning, hypothermia)</li> <li>• Received ALS on scene</li> </ul> | BLS EMS system.                                                                                                                                                                                                                                        |
| Sasson et al, <sup>27</sup> (2008), USA       | Validation study<br>BLS (n=5,505)**<br>ALS TOR (n=5,505)                                | Retrospective analysis of CARES database. Excluded patient groups: <ul style="list-style-type: none"> <li>• Obviously deceased (rigor mortis, lividity, decomposition, decapitation)</li> <li>• Age &lt; 16</li> <li>• Non-cardiac aetiology</li> </ul>                                                                                                                                         | 8 US cities submit data to the CARES registry. There is a mix of EMS response models. Although not explicitly stated it is assumed all cities provide ALS level paramedic response. There are no details addressing single or tiered response systems. |
| Shibahashi et al, <sup>13</sup> (2020), Japan | Derivation study<br>Shibahashi 3 (n=582)                                                | Retrospective analysis of FDMA database. Excluded patient groups; <ul style="list-style-type: none"> <li>• Age &gt;17</li> <li>• Non-RTC trauma</li> <li>• Medical</li> </ul>                                                                                                                                                                                                                   | Single tier EMS system. EMT level providers can provide defibrillation, airway adjunct insertion, IV access, IV infusion. ALS providers can perform ETI and administer adrenaline. EMS personnel cannot legally terminate resuscitation                |
| Skrifvars et al, <sup>28</sup> (2010), Sweden | Validation study<br>ALS TOR (n=20,705)<br>ERC TOR (n=20,705)<br>Helsinki TOR (n=20,705) | Retrospective analysis of the Swedish Cardiac Arrest Registry. Excluded patient groups: <ul style="list-style-type: none"> <li>• EMS witnessed</li> <li>• Presenting in VF or VT</li> <li>• Defined as non-shockable without specifying Asystole or PEA</li> <li>• Trauma aetiology</li> <li>• Drowning</li> </ul>                                                                              | Most EMS systems are staffed with either a nurse or paramedic supported by an EMT.                                                                                                                                                                     |

|                                                   |                                                                                                                                                                          |                                                                                                                                                                                                                                                                                                                             |                                                                                                                                                                                                                                                                                                                                                                                       |
|---------------------------------------------------|--------------------------------------------------------------------------------------------------------------------------------------------------------------------------|-----------------------------------------------------------------------------------------------------------------------------------------------------------------------------------------------------------------------------------------------------------------------------------------------------------------------------|---------------------------------------------------------------------------------------------------------------------------------------------------------------------------------------------------------------------------------------------------------------------------------------------------------------------------------------------------------------------------------------|
| SOS-Kanto, <sup>12</sup> (2017), Japan            | Derivation study<br>SOS-Kanto1 TOR (n=13,291)<br>SOS-Kanto2 TOR (n=13,291)<br>SOS-Kanto3 TOR (n=13,291)<br>Validation study<br>BLS (n=13,291)**<br>Goto 2 TOR (n=13,291) | Retrospective analysis of all cardiac arrest cases occurring in Japanese Association for Acute Medicine in the Kanto Region.<br>Excluded patient groups: <ul style="list-style-type: none"> <li>• Age &lt; 18</li> <li>• In hospital/clinic resuscitation attempt</li> </ul>                                                | Single tier EMS system. EMT level providers can provide defibrillation, airway adjunct insertion, IV access, IV infusion. ALS providers can perform ETI and administer adrenaline. EMS personnel cannot legally terminate resuscitation                                                                                                                                               |
| Smits et al, <sup>29</sup> (2023), Netherlands    | Validation study<br>ALS (n=21,808) (male)<br>ALS (n=10,772) (female)                                                                                                     | Retrospective analysis of ARREST, SRCR & DANCAR registries. Excluded patient groups: <ul style="list-style-type: none"> <li>• Age &lt; 18</li> <li>• Presumed non-cardiac aetiology</li> <li>• Gender data missing</li> </ul>                                                                                               | ALS EMS system                                                                                                                                                                                                                                                                                                                                                                        |
| Verbeek et al, <sup>2</sup> (2002), Canada        | Derivation study<br>BLS TOR (n=622)                                                                                                                                      | Retrospective analysis of all cardiac arrest cases. Excluded patient groups: <ul style="list-style-type: none"> <li>• Obviously deceased (rigor mortis, lividity, decomposition, decapitation)</li> <li>• Trauma, drowning, drug overdose</li> <li>• Received ACLS care</li> <li>• Age &lt; 18</li> <li>• DNACPR</li> </ul> | Tiered EMS system. Fire first response. Closest ambulance assigned, if BLS resource is nearest an ALS ambulance is additionally assigned provided their response time is less than 8 minutes. BLS level providers can provide semi-automatic defibrillation and King airway, while ALS providers can perform manual defibrillation, ETI, IV/IO access and administer ACLS medications |
| Verhaert et al, <sup>30</sup> (2016), Netherlands | Validation study<br>ALS TOR (n=588)                                                                                                                                      | Retrospective analysis of all cardiac arrest cases in the Nijmegen region. Excluded patient groups: <ul style="list-style-type: none"> <li>• Age &lt;18 years</li> <li>• Trauma aetiology (including hanging and drowning)</li> <li>• DNACPR order or terminal illness</li> </ul>                                           | Tiered response that may or may not include police or fire first response. ALS paramedic response that included option to deploy mechanical CPR (LUCAS).                                                                                                                                                                                                                              |

|                                        |                                                                                                                                       |                                                                                                                                                                                                                                                                                                                                                                                                                                                                                                    |                                                                                                                                                                |
|----------------------------------------|---------------------------------------------------------------------------------------------------------------------------------------|----------------------------------------------------------------------------------------------------------------------------------------------------------------------------------------------------------------------------------------------------------------------------------------------------------------------------------------------------------------------------------------------------------------------------------------------------------------------------------------------------|----------------------------------------------------------------------------------------------------------------------------------------------------------------|
| Yates et al, <sup>42</sup> (2018), UK  | Validation study<br>uTOR (n=220)                                                                                                      | Retrospective analysis of all cardiac arrest cases transported to 3 hospitals in 1 city. Included cases were those where ROSC had not been achieved and the patient did not meet the UK criteria for termination of resuscitation by paramedics. There were no excluded patient groups.                                                                                                                                                                                                            | Single tier ALS EMS system.                                                                                                                                    |
| Yoon et al, <sup>7</sup> (2019), Korea | Derivation study<br>KoCARC 1 TOR (n=4,360)<br>KoCARC 2 TOR (n=4,360)<br>KoCARC 3 TOR (n=4,360)<br>Validation study<br>BLS (n=4,360)** | Retrospective analysis of the KoCARC database. Excluded patient groups: <ul style="list-style-type: none"> <li>• Age &lt;18</li> <li>• Obviously deceased (e.g. rigor mortis or dependent lividity)</li> <li>• Terminal illnesses / under hospice care / DNACPR</li> <li>• Pregnant</li> <li>• Non-cardiac aetiology</li> <li>• Poisoning</li> <li>• Primary respiratory arrest</li> <li>• Asphyxia (including hanging)</li> <li>• Drowning</li> <li>• Trauma (including electrocution)</li> </ul> | Single tier EMS system. EMS personnel perform automated external defibrillation and intubation. Intravenous adrenaline is administered on medical instruction. |

---

TOR - termination of resuscitation, ROSC – return of spontaneous circulation, \*\* - these studies incorrectly report efficacy of BLS TOR; they should have reported efficacy of the uTOR as the participating EMS providers functioned above BLS level, VF – ventricular fibrillation, BLS – basic life support, ALS – advanced life support, OHCA – out of hospital cardiac arrest, EMS – Emergency Medical Services, ED – Emergency Department, EMT – Emergency Medical Technician, AED – automated external defibrillator, LMA, laryngeal mask airway, IV – intravenous, IO – intraosseous, ETI – endotracheal intubation, ACLS – advanced cardiac life support, tCPA – traumatic cardiopulmonary arrest, NAEMSP – National Association of Emergency Medical Services Physicians, DNAR – do not attempt resuscitation order,

**eTable 11. Description of Termination of Resuscitation (TOR) Rules**

| TOR Rule  | Criteria to stop resuscitation                                                                                                                                                                                                                                                       | Exclusions                                                                                                                                                                                                                                                  |
|-----------|--------------------------------------------------------------------------------------------------------------------------------------------------------------------------------------------------------------------------------------------------------------------------------------|-------------------------------------------------------------------------------------------------------------------------------------------------------------------------------------------------------------------------------------------------------------|
| ALS       | <ul style="list-style-type: none"> <li>• Not witnessed by bystander <b>AND</b></li> <li>• No bystander CPR <b>AND</b></li> <li>• Not witnessed by EMS <b>AND</b></li> <li>• No shocks delivered (PAD or EMS) <b>AND</b></li> <li>• No ROSC at any time prior to transport</li> </ul> | <ul style="list-style-type: none"> <li>• Non-cardiac aetiology (including trauma, drowning, poisoning, hypothermia)</li> <li>• Obviously deceased (rigor mortis, lividity, decomposition, decapitation)</li> <li>• Age &lt; 16</li> <li>• DNACPR</li> </ul> |
| BLS       | <ul style="list-style-type: none"> <li>• Not witnessed by EMS <b>AND</b></li> <li>• No shocks delivered (PAD or EMS) <b>AND</b></li> <li>• No ROSC at any time prior to transport (after 3<sup>rd</sup> cycle)</li> </ul>                                                            | <ul style="list-style-type: none"> <li>• Obviously deceased (rigor mortis, lividity, decomposition, decapitation)</li> <li>• Trauma, drowning, drug overdose</li> <li>• Received ACLS care</li> <li>• Age &lt; 18</li> <li>• DNACPR</li> </ul>              |
| ERC       | <ul style="list-style-type: none"> <li>• Non-shockable rhythm <b>AND</b></li> <li>• Reversible causes addressed <b>AND</b></li> <li>• 20 minutes of asystole</li> </ul>                                                                                                              | <ul style="list-style-type: none"> <li>• Obviously deceased (decapitation, hemicorporectomy, prolonged submersion, incineration, rigor mortis, dependent lividity and foetal maceration).</li> </ul>                                                        |
| Globber 1 | <ul style="list-style-type: none"> <li>• Not witnessed <b>AND</b></li> <li>• Non-shockable rhythm <b>AND</b></li> <li>• Age &gt;= 80</li> </ul>                                                                                                                                      | <ul style="list-style-type: none"> <li>• Not defined</li> </ul>                                                                                                                                                                                             |
| Goto 1    | <ul style="list-style-type: none"> <li>• Asystole <b>AND</b></li> <li>• Unwitnessed <b>AND</b></li> <li>• No bystander CPR <b>AND</b></li> <li>• Age &gt;= 81 <b>AND</b></li> <li>• EMS resuscitation &gt;14 min</li> </ul>                                                          | <ul style="list-style-type: none"> <li>• EMS witnessed</li> <li>• Age &lt; 18</li> </ul>                                                                                                                                                                    |
| Goto 2    | <ul style="list-style-type: none"> <li>• Not witnessed by bystander <b>AND</b></li> <li>• Non-shockable <b>AND</b></li> </ul>                                                                                                                                                        | <ul style="list-style-type: none"> <li>• EMS witnessed</li> <li>• Age &lt; 18</li> </ul>                                                                                                                                                                    |

- No pre-hospital ROSC

#### Haukoos 1

- Not witnessed **OR**
- Response time > 6 min **OR**
- Nursing home & non-shockable
- Age < 18
- Trauma

#### Helsinki

*Asystole:*

- Unwitnessed **OR**
- Ambulance response time > 10 min **OR**
- No ROSC despite 20 min of ALS.
- Hypothermia
- Drowning
- Penetrating trauma

*Witnessed PEA:*

- Ambulance response time > 15 min **OR**
- No ROSC despite 20 min of ALS.

*Unwitnessed PEA:*

- Ambulance response time > 15 min **OR**
- No ROSC despite 10 min of ALS.

#### Jabre

- Not witnessed by EMS **AND**
- Non-shockable initial cardiac rhythm **AND**
- no ROSC before receipt of a third 1-mg epinephrine dose.
- Age < 18
- Terminal illness
- DNACPR
- Non-cardiac aetiology

#### KoCARC 1

- Not witnessed by EMS **AND**
- Asystole **AND**
- No shocks delivered **AND**
- No ROSC at any time
- Age < 18
- Cut between head and body (believed to imply decapitation)
- Corruption (believed to imply hemicorporectomy)



|          |                                                                                                                                                                                                                               |                                                                                                                                                                                                                                                                                                                                                                                                                            |
|----------|-------------------------------------------------------------------------------------------------------------------------------------------------------------------------------------------------------------------------------|----------------------------------------------------------------------------------------------------------------------------------------------------------------------------------------------------------------------------------------------------------------------------------------------------------------------------------------------------------------------------------------------------------------------------|
| KoCARC 2 | <ul style="list-style-type: none"> <li>• Not witnessed by EMS <b>AND</b></li> <li>• Age &gt; 60 <b>AND</b></li> <li>• No shocks delivered <b>AND</b></li> <li>• No ROSC at any time</li> </ul>                                | <ul style="list-style-type: none"> <li>• Rigor mortis</li> <li>• Age &lt; 18</li> <li>• Cut between head and body (believed to imply decapitation)</li> <li>• Corruption (believed to imply hemicorporectomy)</li> <li>• Rigor mortis</li> </ul>                                                                                                                                                                           |
| KoCARC 3 | <ul style="list-style-type: none"> <li>• Not witnessed by EMS <b>AND</b></li> <li>• Asystole <b>AND</b></li> <li>• Age &gt; 60 <b>AND</b></li> <li>• No shocks delivered <b>AND</b></li> <li>• No ROSC at any time</li> </ul> | <ul style="list-style-type: none"> <li>• Age &lt; 18</li> <li>• Cut between head and body (believed to imply decapitation)</li> <li>• Corruption (believed to imply hemicorporectomy)</li> <li>• Rigor mortis</li> </ul>                                                                                                                                                                                                   |
| KoCARC 4 | <ul style="list-style-type: none"> <li>• Not witnessed by bystander <b>AND</b></li> <li>• Asystole <b>AND</b></li> <li>• No ROSC at any time</li> </ul>                                                                       | <ul style="list-style-type: none"> <li>• Age &lt;18</li> <li>• Obviously deceased (e.g. rigor mortis or dependent lividity)</li> <li>• Terminal illnesses / under hospice care / DNACPR</li> <li>• Pregnant</li> <li>• Non-cardiac aetiology</li> <li>• Trauma (including electrocution)</li> <li>• Poisoning</li> <li>• Primary respiratory arrest</li> <li>• Drowning</li> <li>• asphyxia (including hanging)</li> </ul> |
| KoCARC 5 | <ul style="list-style-type: none"> <li>• Not witnessed by bystander <b>AND</b></li> <li>• No ROSC at any time <b>AND</b></li> <li>• Asystole on arrival at ED</li> </ul>                                                      | <ul style="list-style-type: none"> <li>• Age &lt;18</li> <li>• Obviously deceased (e.g. rigor mortis or dependent lividity)</li> <li>• Terminal illnesses / under hospice care / DNACPR</li> <li>• Pregnant</li> </ul>                                                                                                                                                                                                     |

|                        |                                                                                                                                                                                                                                                                                                                        |                                                                                                                                                                                                                                              |
|------------------------|------------------------------------------------------------------------------------------------------------------------------------------------------------------------------------------------------------------------------------------------------------------------------------------------------------------------|----------------------------------------------------------------------------------------------------------------------------------------------------------------------------------------------------------------------------------------------|
|                        |                                                                                                                                                                                                                                                                                                                        | <ul style="list-style-type: none"> <li>• Non-cardiac aetiology</li> <li>• Poisoning</li> <li>• Primary respiratory arrest</li> <li>• Asphyxia (including hanging)</li> <li>• Drowning</li> <li>• Trauma (including electrocution)</li> </ul> |
| <b>Marsden</b>         | <ul style="list-style-type: none"> <li>• Non-shockable rhythm on arrival <b>AND</b></li> <li>• No bystander CPR in preceding 15 min <b>AND</b></li> <li>• Not excluded patient group <b>AND</b></li> <li>• No ROSC or shockable rhythm after 1 min CPR <b>AND</b></li> <li>• Continuous asystole for 10 sec</li> </ul> | <ul style="list-style-type: none"> <li>• Age &lt; 18</li> <li>• Pregnant</li> <li>• Poisoning or overdose</li> <li>• Hypothermia</li> <li>• Drowning</li> </ul>                                                                              |
| <b>MIEMS (medical)</b> | <ul style="list-style-type: none"> <li>• Age &lt;18</li> <li>• EMS scene time &gt;30min</li> <li>• Initial non-shockable rhythm</li> <li>• EtCO2&lt;15mmHg</li> </ul>                                                                                                                                                  | <ul style="list-style-type: none"> <li>• Age&gt;18</li> <li>• Trauma</li> </ul>                                                                                                                                                              |
| <b>MIEMS (trauma)</b>  | <ul style="list-style-type: none"> <li>• Age &lt;18 or 15</li> <li>• EMS scene time &gt;10min</li> <li>• Initial non-shockable rhythm</li> <li>• EtCO2&lt;15mmHg</li> <li>•</li> </ul>                                                                                                                                 | <ul style="list-style-type: none"> <li>• Age &gt;18</li> <li>• Medical</li> </ul>                                                                                                                                                            |
| <b>NAEMSP</b>          | <ul style="list-style-type: none"> <li>• Received &gt; 20 min ALS (definitive airway, defibrillation, IV ACLS drug therapy) <b>AND</b></li> <li>• Remains non-shockable <b>AND</b></li> <li>• No ROSC at any time</li> </ul>                                                                                           | <ul style="list-style-type: none"> <li>• Age &lt; 18</li> <li>• Trauma</li> <li>• Hypothermia</li> <li>• Drowning</li> </ul>                                                                                                                 |
| <b>No ROSC</b>         | <ul style="list-style-type: none"> <li>• No ROSC at any time</li> </ul>                                                                                                                                                                                                                                                | <ul style="list-style-type: none"> <li>• Persistent VF</li> <li>• Age &lt; 18</li> <li>• Trauma</li> <li>• Hypothermia</li> <li>• Primary respiratory aetiology</li> <li>• Overdose</li> </ul>                                               |

|               |                                                                                                                                                                                  |                                                                                                                                                                                                                                                                  |
|---------------|----------------------------------------------------------------------------------------------------------------------------------------------------------------------------------|------------------------------------------------------------------------------------------------------------------------------------------------------------------------------------------------------------------------------------------------------------------|
| PEA<br>Petrie | <ul style="list-style-type: none"> <li>•</li> <li>• Asystole <b>AND</b></li> <li>• Response time &gt; 8 min</li> </ul>                                                           | <ul style="list-style-type: none"> <li>•</li> <li>• Non-cardiac aetiology (inc trauma, drowning, poisoning, hypothermia)</li> <li>• Obviously deceased (rigor mortis, lividity, decomposition, decapitation)</li> <li>• Age &lt; 16</li> <li>• DNACPR</li> </ul> |
| Shibahashi 1  | <ul style="list-style-type: none"> <li>• Non-shockable rhythm <b>AND</b></li> <li>• Not witnessed <b>AND</b></li> <li>• Age &gt;=73</li> </ul>                                   | <ul style="list-style-type: none"> <li>• Age &gt; 120</li> <li>• EMS physician team</li> </ul>                                                                                                                                                                   |
| Shibahashi 3  | <ul style="list-style-type: none"> <li>•</li> </ul>                                                                                                                              | <ul style="list-style-type: none"> <li>•</li> </ul>                                                                                                                                                                                                              |
| SOS Kanto 1   | <ul style="list-style-type: none"> <li>• Not witnessed by bystander <b>AND</b></li> <li>• Non-shockable in field <b>AND</b></li> <li>• Non-shockable on arrival at ED</li> </ul> | <ul style="list-style-type: none"> <li>• Age &lt; 18</li> <li>• Obvious signs of death (e.g. decapitation, incineration, decomposition, rigor mortis, or dependent lividity)</li> </ul>                                                                          |
| SOS Kanto 2   | <ul style="list-style-type: none"> <li>• Not witnessed by bystander <b>AND</b></li> <li>• Non-shockable in field <b>AND</b></li> <li>• Asystole on arrival at ED</li> </ul>      | <ul style="list-style-type: none"> <li>• Age &lt; 18</li> <li>• Obvious signs of death (e.g. decapitation, incineration, decomposition, rigor mortis, or dependent lividity)</li> </ul>                                                                          |
| SOS Kanto 3   | <ul style="list-style-type: none"> <li>• Not witnessed by bystander <b>AND</b></li> <li>• Asystole in field <b>AND</b></li> <li>• Asystole on arrival at ED</li> </ul>           | <ul style="list-style-type: none"> <li>• Age &lt; 18</li> <li>• Obvious signs of death (e.g. decapitation, incineration, decomposition, rigor mortis, or dependent lividity)</li> </ul>                                                                          |
| tCPA          | <ul style="list-style-type: none"> <li>• Blunt trauma <b>AND</b></li> <li>• Asystole</li> </ul>                                                                                  | <ul style="list-style-type: none"> <li>• Age &lt; 18</li> <li>• Obviously deceased (e.g. decapitation or rigour mortis)</li> </ul>                                                                                                                               |

uTOR

- Not witnessed by EMS **AND**
  - No shocks delivered (PAD or EMS) **AND**
  - No ROSC at any time prior to transport (after 3<sup>rd</sup> cycle)
- DNACPR
  - Any medical cause
  - Penetrating trauma
- Age < 18
  - Obviously deceased (rigor mortis, lividity, decomposition, decapitation)
  - Trauma, drowning, drug overdose
  - DNACPR
-

**eFigure 1. QUADAS-2 Summary Risk of Bias and Applicability**

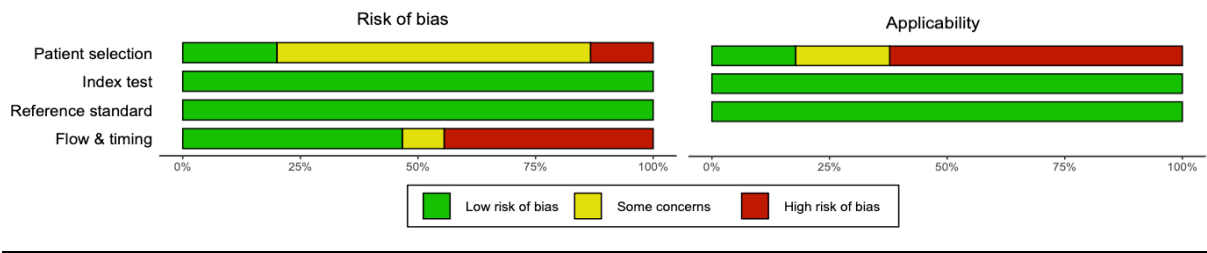

**eFigure 2. Study Risk of Bias**

| Author year                           | Risk of bias      |            |                    |                 | Applicability     |            |                    |
|---------------------------------------|-------------------|------------|--------------------|-----------------|-------------------|------------|--------------------|
|                                       | Patient Selection | Index Test | Reference Standard | Flow and Timing | Patient Selection | Index Test | Reference Standard |
| Bonnin et al, <sup>14</sup> (1993)    | ?                 | +          | +                  | +               | ×                 | +          | +                  |
| Cheong et al, <sup>16</sup> (2016)    | ?                 | +          | +                  | +               | ×                 | +          | +                  |
| Chiang et al, <sup>17</sup> (2015)    | ?                 | +          | +                  | +               | ?                 | +          | +                  |
| Chiang et al, <sup>15</sup> (2016)    | ?                 | +          | +                  | +               | ×                 | +          | +                  |
| Cone et al, <sup>37</sup> (2005)      | ?                 | +          | +                  | ×               | ×                 | +          | +                  |
| Diskin et al, <sup>18</sup> (2014)    | ?                 | +          | +                  | ×               | ×                 | +          | +                  |
| Drennan et al, <sup>39</sup> (2014)   | ?                 | +          | +                  | ×               | ×                 | +          | +                  |
| Fukada et al, <sup>19</sup> (2014)    | ?                 | +          | +                  | +               | +                 | +          | +                  |
| Glober et al, <sup>3</sup> (2019)     | +                 | +          | +                  | ×               | ×                 | +          | +                  |
| Glober et al, <sup>34</sup> (2020)    | +                 | +          | +                  | ×               | ×                 | +          | +                  |
| Goto et al, <sup>4</sup> (2019)       | +                 | +          | +                  | +               | +                 | +          | +                  |
| Grunau et al, <sup>40</sup> (2017)    | ?                 | +          | +                  | ×               | ×                 | +          | +                  |
| Grunau et al, <sup>38</sup> (2019)    | ?                 | +          | +                  | ×               | ×                 | +          | +                  |
| Harris et al, <sup>36</sup> (2021)    | +                 | +          | +                  | +               | +                 | +          | +                  |
| Haukoos et al, <sup>5</sup> (2004)    | ?                 | +          | +                  | ?               | ?                 | +          | +                  |
| House et al, <sup>10</sup> (2018)     | +                 | +          | +                  | ×               | ×                 | +          | +                  |
| Hreinsson et al, <sup>20</sup> (2020) | ?                 | +          | +                  | ×               | ×                 | +          | +                  |
| Hsu et al, <sup>21</sup> (2022)       | +                 | +          | +                  | ×               | +                 | +          | +                  |
| Jabre et al, <sup>6</sup> (2016)      | ×                 | +          | +                  | ×               | ×                 | +          | +                  |
| Jordan et al, <sup>41</sup> (2017)    | ?                 | +          | +                  | ×               | ×                 | +          | +                  |
| Kajino et al, <sup>22</sup> (2013)    | ?                 | +          | +                  | +               | ×                 | +          | +                  |
| Kashiura et al, <sup>23</sup> (2016)  | ?                 | +          | +                  | +               | +                 | +          | +                  |
| Kim et al, <sup>31</sup> (2015)       | ?                 | +          | +                  | +               | ×                 | +          | +                  |
| Lee et al, <sup>8</sup> (2019)        | ?                 | +          | +                  | +               | ?                 | +          | +                  |
| Lin et al, <sup>24</sup> (2022)       | ?                 | +          | +                  | +               | ?                 | +          | +                  |
| Marsden et al, <sup>9</sup> (1995)    | ?                 | +          | +                  | ×               | ×                 | +          | +                  |
| Matsui et al, <sup>25</sup> (2023)    | +                 | +          | +                  | +               | +                 | +          | +                  |
| Morrison et al, <sup>1</sup> (2007)   | ?                 | +          | +                  | ?               | ?                 | +          | +                  |
| Morrison et al, <sup>26</sup> (2009)  | ?                 | +          | +                  | ×               | ×                 | +          | +                  |
| Morrison et al, <sup>43</sup> (2014)  | ?                 | +          | +                  | ×               | ×                 | +          | +                  |
| Ong et al, <sup>32</sup> (2006)       | ?                 | +          | +                  | ×               | ×                 | +          | +                  |
| Ong et al, <sup>33</sup> (2007)       | +                 | +          | +                  | +               | +                 | +          | +                  |
| Park et al, <sup>35</sup> (2023)      | ×                 | +          | +                  | ×               | ×                 | +          | +                  |
| Petrie et al, <sup>11</sup> (2001)    | ?                 | +          | +                  | ×               | ×                 | +          | +                  |

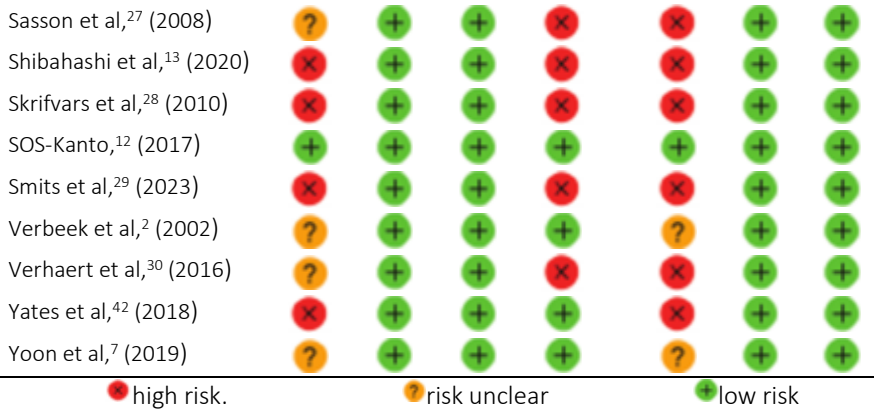

**eFigure 3.** Deeks Funnel Plot Asymmetry Test

BLS TOR rule

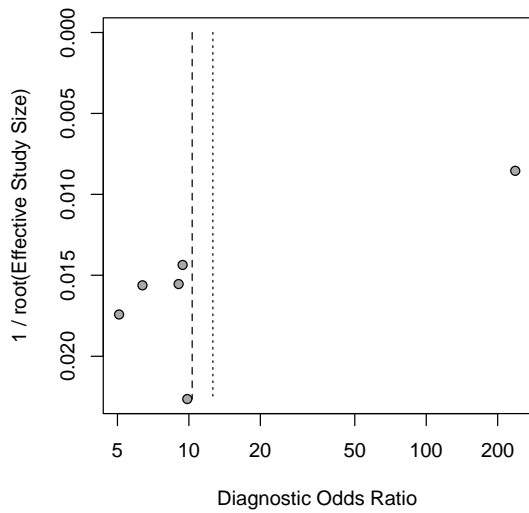

ALS TOR rule

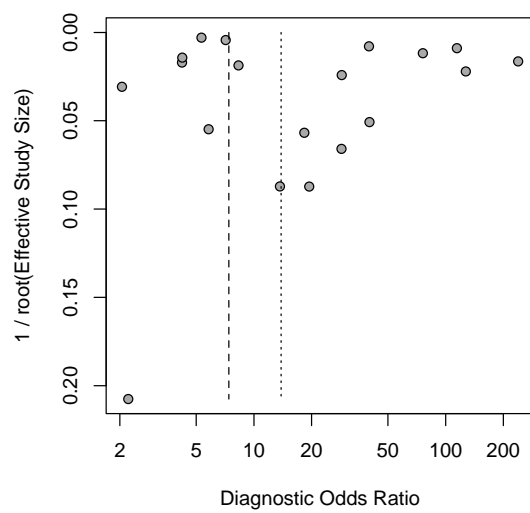

uTOR rule

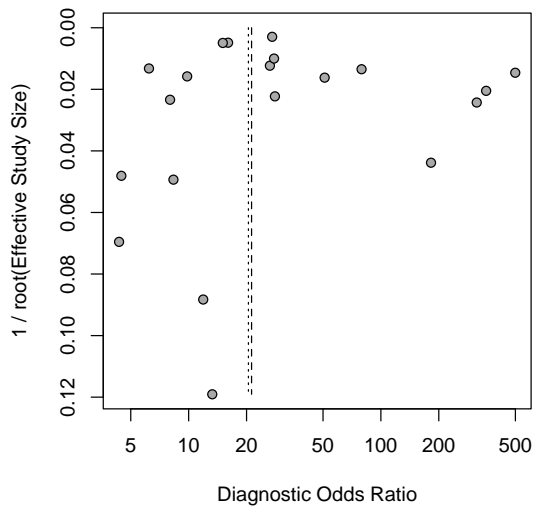

**eFigure 4. Bivariate Summary Receiver Operating Characteristic (SROC) Curves**

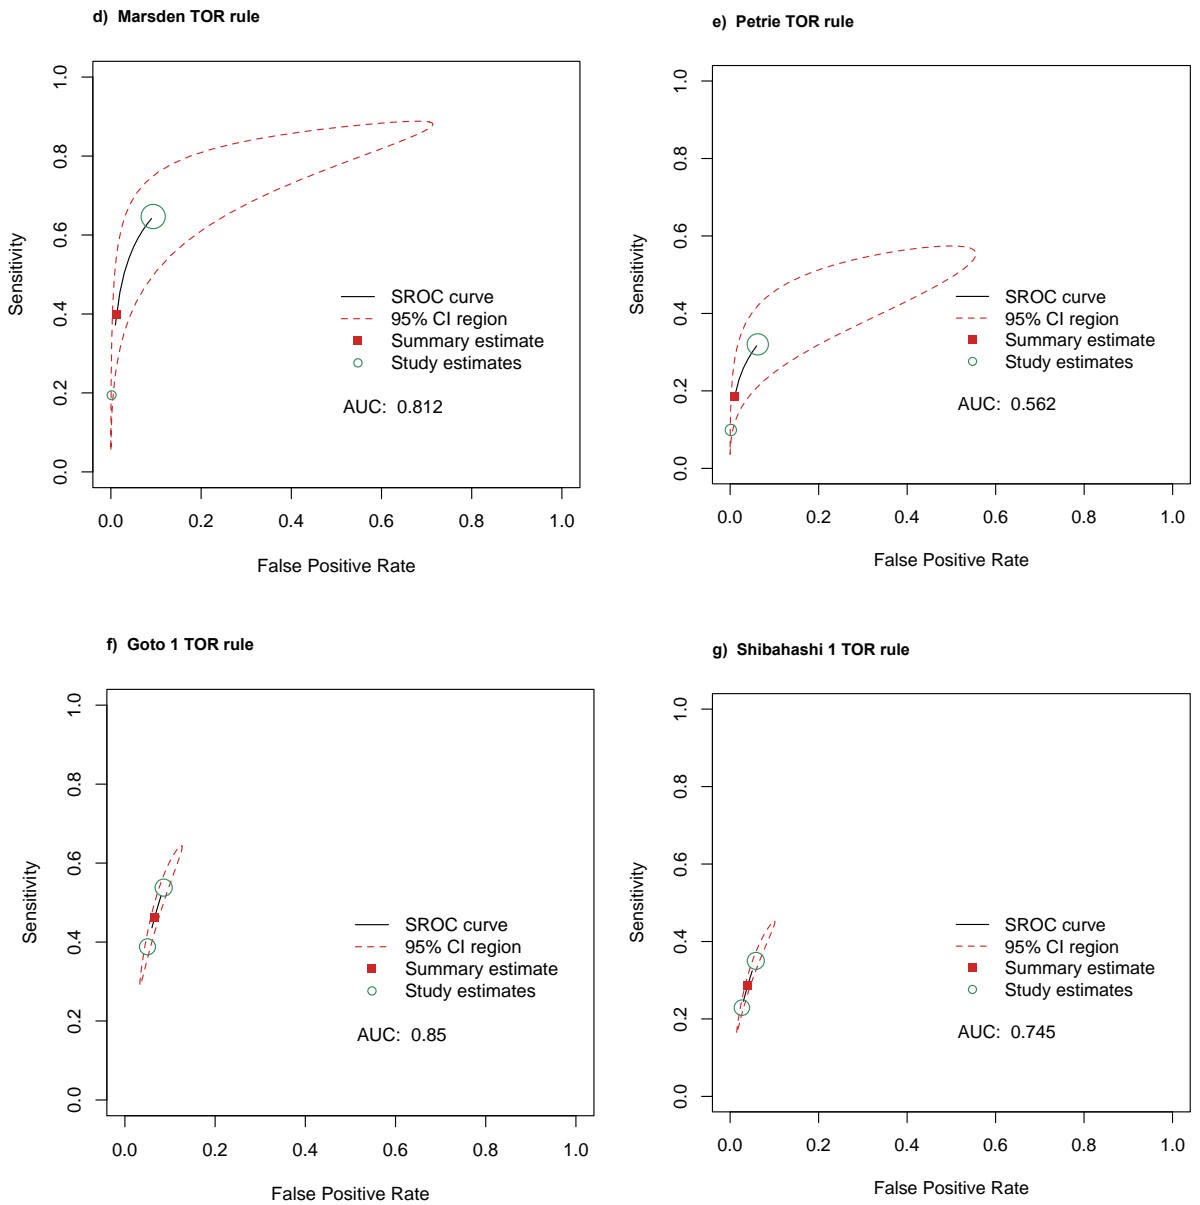



## eReferences

1. Morrison LJ, Verbeek PR, Vermeulen MJ, et al. Derivation and evaluation of a termination of resuscitation clinical prediction rule for advanced life support providers. *Resuscitation* 2007;74:266-75.
2. Verbeek PR, Vermeulen MJ, Ali FH, Messenger DW, Summers J, Morrison LJ. Derivation of a termination-of-resuscitation guideline for emergency medical technicians using automated external defibrillators. *Academic Emergency Medicine* 2002;9:671-8.
3. Glober NK, Tainter CR, Abramson TM, Staats K, Gilbert G, Kim D. A simple decision rule predicts futile resuscitation of out-of-hospital cardiac arrest. *Resuscitation* 2019;142:8-13.
4. Goto Y, Funada A, Maeda T, Okada H, Goto Y. Field termination-of-resuscitation rule for refractory out-of-hospital cardiac arrests in Japan. *J Cardiol* 2019;73:240-6.
5. Haukoos JS, Lewis RJ, Niemann JT. Prediction rules for estimating neurologic outcome following out-of-hospital cardiac arrest. *Resuscitation* 2004;63:145-55.
6. Jabre P, Bougouin W, Dumas F, et al. Early Identification of Patients With Out-of-Hospital Cardiac Arrest With No Chance of Survival and Consideration for Organ Donation. *Annals of Internal Medicine* 2016;165:770-8.
7. Yoon JC, Kim Y-J, Ahn S, et al. Factors for modifying the termination of resuscitation rule in out-of-hospital cardiac arrest. *Am Heart J* 2019;213:73-80.
8. Lee DE, Lee MJ, Ahn JY, et al. New Termination-of-Resuscitation Models and Prognostication in Out-of-Hospital Cardiac Arrest Using Electrocardiogram Rhythms Documented in the Field and the Emergency Department. *J Korean Med Sci* 2019;34:e134.
9. Marsden AK, Ng GA, Dalziel K, Cobbe SM. When is it futile for ambulance personnel to initiate cardiopulmonary resuscitation? *BMJ* 1995;311:49-51.
10. House M, Gray J, McMeekin P. Reducing the futile transportation of out-of-hospital cardiac arrests: a retrospective validation. *Br Paramed J* 2018;3:1-6.
11. Petrie DA, De Maio V, Stiell IG, Dreyer J, Martin M, O'Brien J A. Factors affecting survival after prehospital asystolic cardiac arrest in a Basic Life Support-Defibrillation system. *Cjem* 2001;3:186-92.
12. Group S-KS. A New Rule for Terminating Resuscitation of Out-of-Hospital Cardiac Arrest Patients in Japan: A Prospective Study. *Journal of Emergency Medicine* 2017;53:345-52.
13. Shibahashi K, Sugiyama K, Hamabe Y. A potential termination of resuscitation rule for EMS to implement in the field for out-of-hospital cardiac arrest: An observational cohort study. *Resuscitation* 2018;130:28-32.
14. Bonnin MJ, Pepe PE, Kimball KT, Clark PS, Jr. Distinct criteria for termination of resuscitation in the out-of-hospital setting. *JAMA* 1993;270:1457-62.
15. Chiang WC, Huang YS, Hsu SH, et al. Performance of a simplified termination of resuscitation rule for adult traumatic cardiopulmonary arrest in the prehospital setting. *Emerg Med J* 2017;34:39-45.
16. Cheong RW, Li H, Doctor NE, et al. Termination of Resuscitation Rules to Predict Neurological Outcomes in Out-of-Hospital Cardiac Arrest for an Intermediate Life Support Prehospital System. *Prehosp Emerg Care* 2016;20:623-9.
17. Chiang WC, Ko PC, Chang AM, et al. Predictive performance of universal termination of resuscitation rules in an Asian community: are they accurate enough? *Emergency Medicine Journal* 2015;32:318-23.
18. Diskin FJ, Camp-Rogers T, Peberdy MA, Ornato JP, Kurz MC. External validation of termination of resuscitation guidelines in the setting of intra-arrest cold saline, mechanical CPR, and comprehensive post resuscitation care. *Resuscitation* 2014;85:910-4.
19. Fukuda T, Ohashi N, Matsubara T, et al. Applicability of the prehospital termination of resuscitation rule in an area dense with hospitals in Tokyo: a single-center, retrospective, observational study: is the pre hospital TOR rule applicable in Tokyo? *Am J Emerg Med* 2014;32:144-9.
20. Hreinsson JP, Thorvaldsson AP, Magnusson V, Fridriksson BT, Libungan BG, Karason S. Identifying out-of-hospital cardiac arrest patients with no chance of survival: An independent validation of prediction rules. *Resuscitation* 2020;146:19-25.

21. Hsu SH, Sun JT, Huang EP, et al. The predictive performance of current termination-of-resuscitation rules in patients following out-of-hospital cardiac arrest in Asian countries: A cross-sectional multicentre study. *PLoS One* 2022;17:e0270986.
22. Kajino K, Kitamura T, Iwami T, et al. Current termination of resuscitation (TOR) guidelines predict neurologically favorable outcome in Japan. *Resuscitation* 2013;84:54-9.
23. Kashiura M, Hamabe Y, Akashi A, et al. Applying the termination of resuscitation rules to out-of-hospital cardiac arrests of both cardiac and non-cardiac etiologies: a prospective cohort study. *Crit Care* 2016;20:49.
24. Lin Y-Y, Lai Y-Y, Chang H-C, et al. Predictive performances of ALS and BLS termination of resuscitation rules in out-of-hospital cardiac arrest for different resuscitation protocols. *BMC emergency medicine* 2022;22:53.
25. Matsui S, Kitamura T, Kurosawa H, et al. Application of adult prehospital resuscitation rules to pediatric out of hospital cardiac arrest. *Resuscitation* 2023;184:109684.
26. Morrison LJ, Verbeek PR, Zhan C, Kiss A, Allan KS. Validation of a universal prehospital termination of resuscitation clinical prediction rule for advanced and basic life support providers. *Resuscitation* 2009;80:324-8.
27. Sasson C, Hegg AJ, Macy M, et al. Prehospital termination of resuscitation in cases of refractory out-of-hospital cardiac arrest. *JAMA* 2008;300:1432-8.
28. Skrifvars MB, Vayrynen T, Kuisma M, et al. Comparison of Helsinki and European Resuscitation Council "do not attempt to resuscitate" guidelines, and a termination of resuscitation clinical prediction rule for out-of-hospital cardiac arrest patients found in asystole or pulseless electrical activity. *Resuscitation* 2010;81:679-84.
29. Smits RLA, Sodergren STF, van Schuppen H, et al. Termination of resuscitation in out-of-hospital cardiac arrest in women and men: An ESCAPE-NET project. *Resuscitation* 2023;185:109721.
30. Verhaert DV, Bonnes JL, Nas J, et al. Termination of resuscitation in the prehospital setting: A comparison of decisions in clinical practice vs. recommendations of a termination rule. *Resuscitation* 2016;100:60-5.
31. Kim TH, Shin SD, Kim YJ, Kim CH, Kim JE. The scene time interval and basic life support termination of resuscitation rule in adult out-of-hospital cardiac arrest. *J Korean Med Sci* 2015;30:104-9.
32. Ong MEH, Jaffey J, Stiell I, Nesbitt L. Comparison of termination-of-resuscitation guidelines for basic life support: Defibrillator providers in out-of-hospital cardiac arrest. *Annals of Emergency Medicine* 2006;47:337-43.
33. Ong ME, Tan EH, Ng FS, et al. Comparison of termination-of-resuscitation guidelines for out-of-hospital cardiac arrest in Singapore EMS. *Resuscitation* 2007;75:244-51.
34. Guber NK, Lardaro T, Christopher S, Tainter CR, Weinstein E, Kim D. Validation of the NUE Rule to Predict Futile Resuscitation of Out-of-Hospital Cardiac Arrest. *Prehospital emergency care : official journal of the National Association of EMS Physicians and the National Association of State EMS Directors* 2020:1-6.
35. Park SY, Lim D, Ryu JH, Kim YH, Choi B, Kim SH. Modification of termination of resuscitation rule with compression time interval in South Korea. *Scientific reports* 2023;13:1403.
36. Harris MI, Crowe RP, Anders J, D'Acunzio S, Adalgais KM, Fische J. Applying a set of termination of resuscitation criteria to paediatric out-of-hospital cardiac arrest. *Resuscitation* 2021;169:175-81.
37. Cone DC, Bailey ED, Spackman AB. The safety of a field termination-of-resuscitation protocol. *Prehospital Emergency Care* 2005;9:276-81.
38. Grunau B, Scheuermeyer F, Kawano T, et al. North American validation of the Bokutoh criteria for withholding professional resuscitation in non-traumatic out-of-hospital cardiac arrest. *Resuscitation* 2019;135:51-6.
39. Drennan IR, Lin S, Sidalak DE, Morrison LJ. Survival rates in out-of-hospital cardiac arrest patients transported without prehospital return of spontaneous circulation: an observational cohort study. *Resuscitation* 2014;85:1488-93.

40. Grunau B, Taylor J, Scheuermeyer FX, et al. External Validation of the Universal Termination of Resuscitation Rule for Out-of-Hospital Cardiac Arrest in British Columbia. *Annals of Emergency Medicine* 2017;70:374-81.e1.
41. Jordan MR, O'Keefe MF, Weiss D, Cubberley CW, MacLean CD, Wolfson DL. Implementation of the universal BLS termination of resuscitation rule in a rural EMS system. *Resuscitation* 2017;118:75-81.
42. Yates EJ, Schmidbauer S, Smyth AM, et al. Out-of-hospital cardiac arrest termination of resuscitation with ongoing CPR: An observational study. *Resuscitation* 2018;130:21-7.
43. Morrison LJ, Eby D, Veigas PV, et al. Implementation trial of the basic life support termination of resuscitation rule: reducing the transport of futile out-of-hospital cardiac arrests. *Resuscitation* 2014;85:486-91.
