# Supplementary material for: Termination of Resuscitation Rules and Survival Among Patients With Out-of-Hospital Cardiac Arrest: A Systematic Review and Meta-Analysis
Source: PubMed Central journal article supplement (PMC11222995; doi:10.1001/jamanetworkopen.2024.20040), 2024-07-03
Supplement: jamanetwopen-e2420040-s002.pdf [file jamanetwopen-e2420040-s002.pdf]

## Data Sharing Statement

Smyth. Termination of Resuscitation Rules and Survival Among Patients With Out-of-Hospital Cardiac Arrest. *JAMA Netw Open*. Published July 03, 2024.

doi:10.1001/jamanetworkopen.2024.20040

### Data

**Data available:** Yes

**Data types:** Other (please specify)

**Additional Information:** contingency table data for each included study

**How to access data:** [m.a.smyth@warwick.ac.uk](mailto:m.a.smyth@warwick.ac.uk)

**When available:** With publication

### Supporting Documents

**Document types:** None

### Additional Information

**Who can access the data:** researchers whose proposed use of the data has been approved

**Types of analyses:** research purposes

**Mechanisms of data availability:** after approval of a proposal
